# Supplementary material for: The Accuracy of Semi-Empirical Quantum Chemistry Methods on Soot Formation Simulation
Source: MDPI journal article supplement (doi:10.3390/ijms232113371), 2022-11-02
Supplement: s1 [file s1]

Supporting Information of

# The Accuracy of Semi-empirical Quantum Chemistry Methods on Soot Formation Simulation

Yang Cong<sup>1</sup>, Yu Zhai<sup>1</sup>, Xin Chen<sup>2,†</sup>, and Hui Li<sup>1,†</sup>

<sup>1</sup>*Institute of Theoretical Chemistry, College of Chemistry, Jilin University, 2519 Jiefang Road, Changchun 130023, Peoples Republic of China*

<sup>2</sup>*Shenzhen Bay Laboratory, Shenzhen 518055, China*

<sup>†</sup>Email: chenxin@szbl.ac.cn; prof\_huili@jlu.edu.cn.

## 1 Energy profiles shape of soot in MD trajectory

In section 2.2 of the article, we performed molecular dynamics and extracted 84 soot structures from the global trajectory. For these structures, their trajectory changes over a time length of about 100-200 fs were recorded, and the Relative energy change curves of each structure during this period of time were calculated using different methods (for example AM1, PM6, PM7, xTB, DFTB).

We classify the trajectories of the above 84 soot structures according to the number of carbon atoms. The naming rule is: "C-XX(number of carbon atoms)-XX (structure number)", if there is one or more oxygen atoms in the structure, add "-O" at the end ". Among all trajectories, the trajectories before the structure named "C-10-7-O" are from the molecular dynamics based on the DFT method, and all the structures after this are from the molecular dynamics based on the reaction force field.

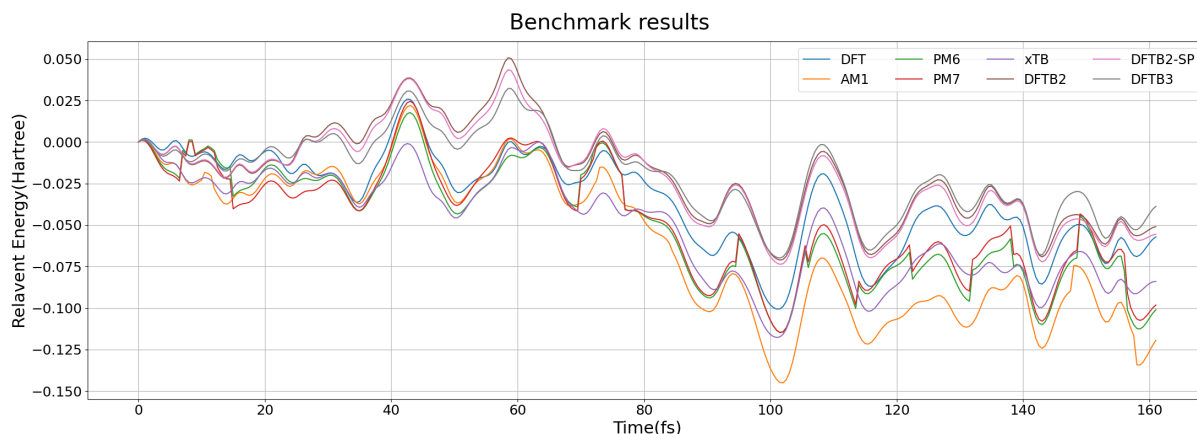

Figure S1: Carbon-4, Trajectory-1.

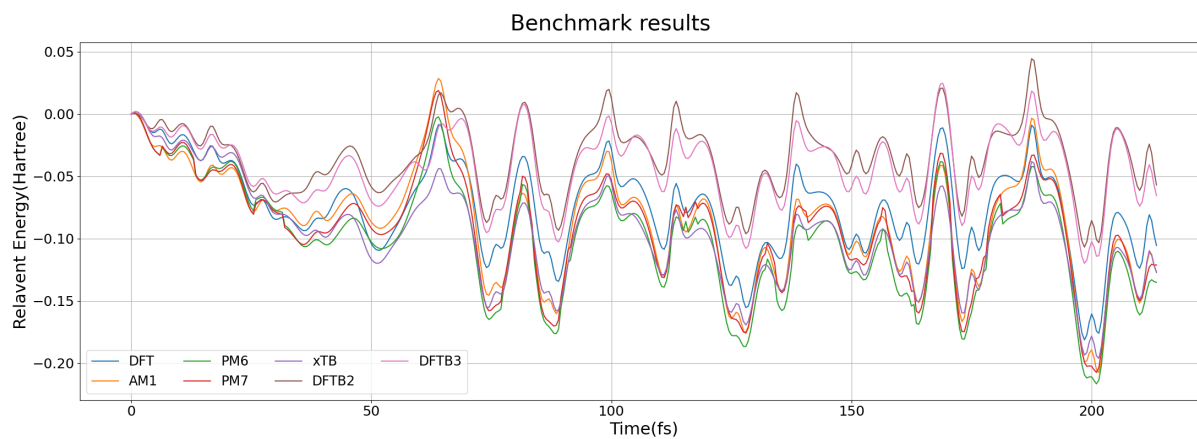

Figure S2: Carbon-4,Trajectory-2.

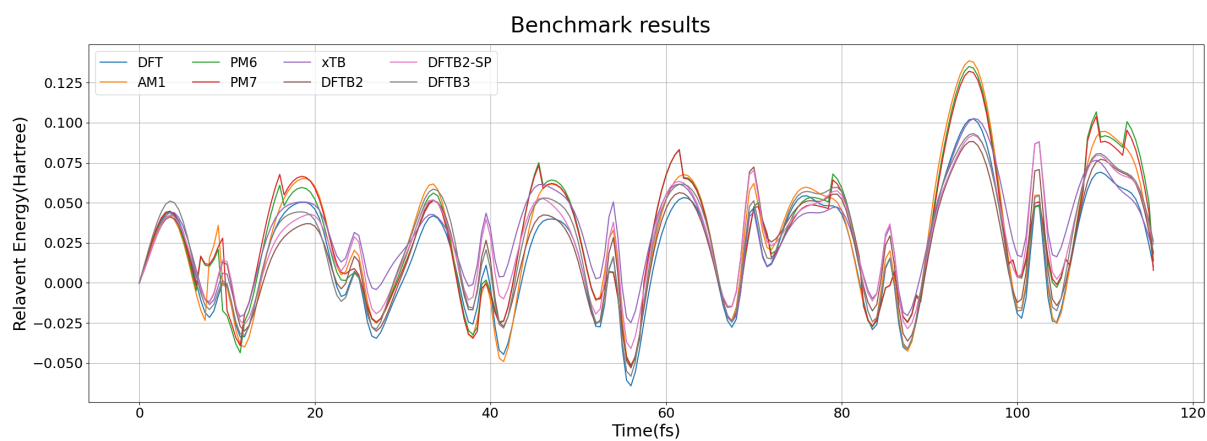

Figure S3: Carbon-5,Trajectory-1.

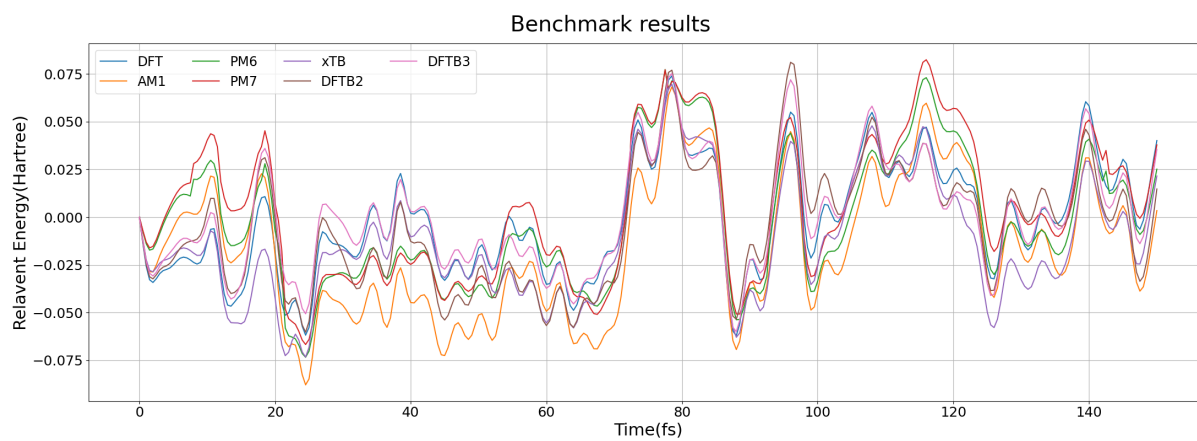

Figure S4: Carbon-5,Trajectory-2.

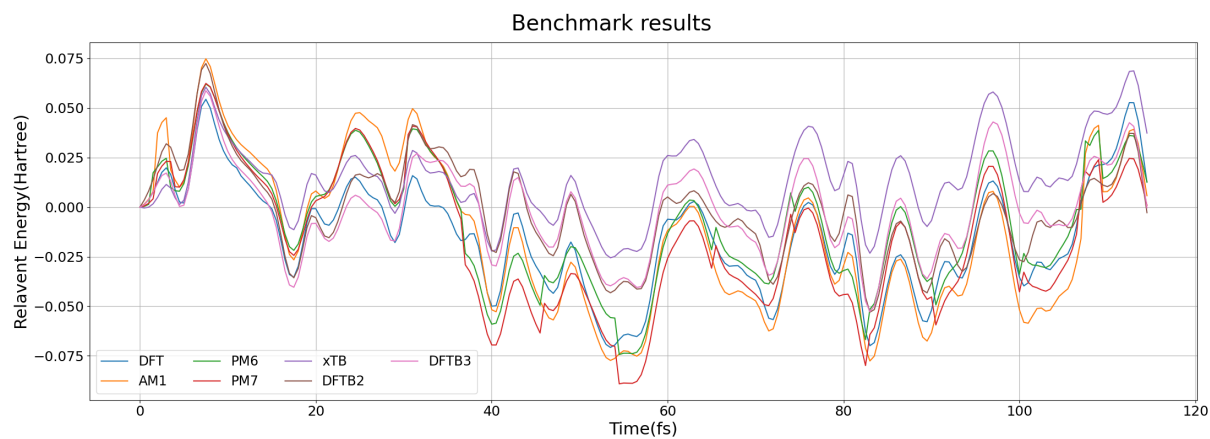

Figure S5: Carbon-5,Trajectory-3.

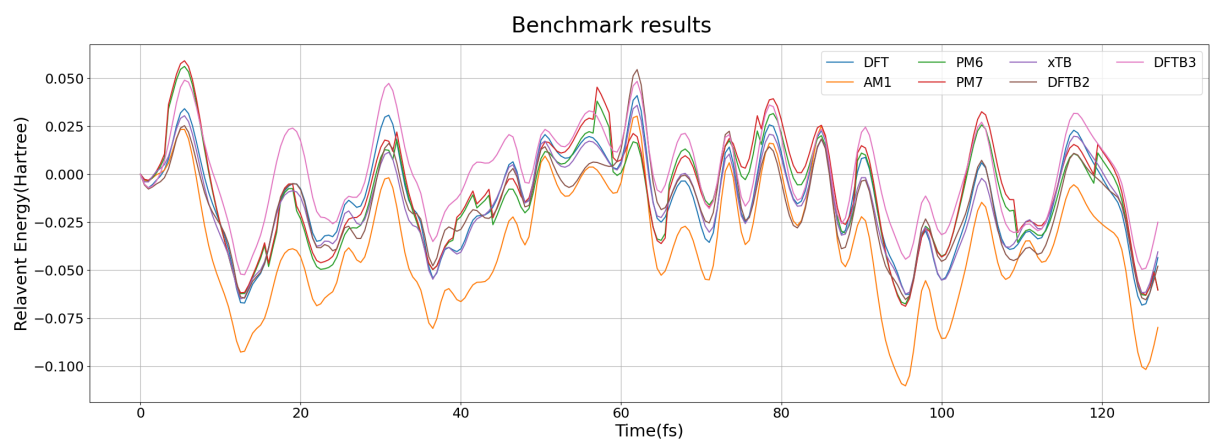

Figure S6: Carbon-5,Trajectory-4.

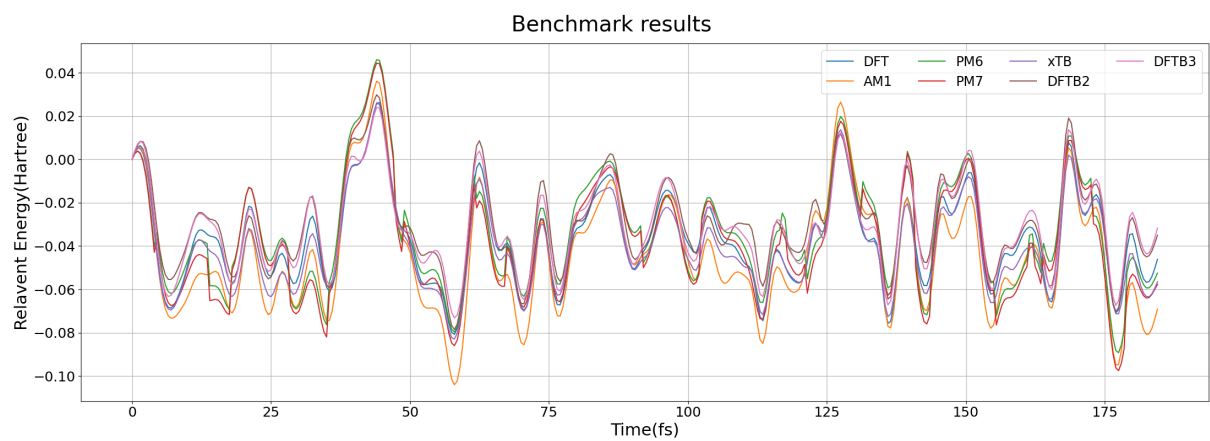

Figure S7: Carbon-5,Trajectory-5.

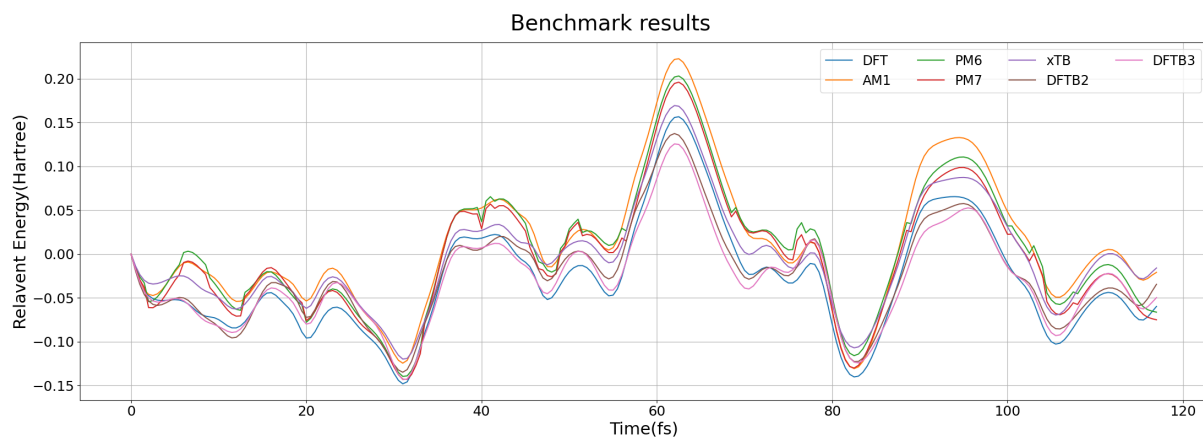

Figure S8: Carbon-5,Trajectory-6.

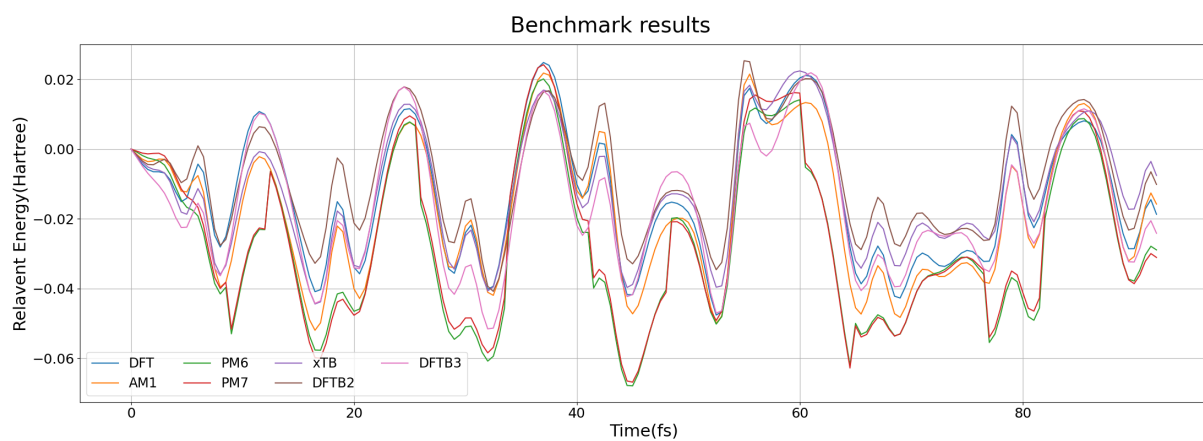

Figure S9: Carbon-5,Trajectory-7.

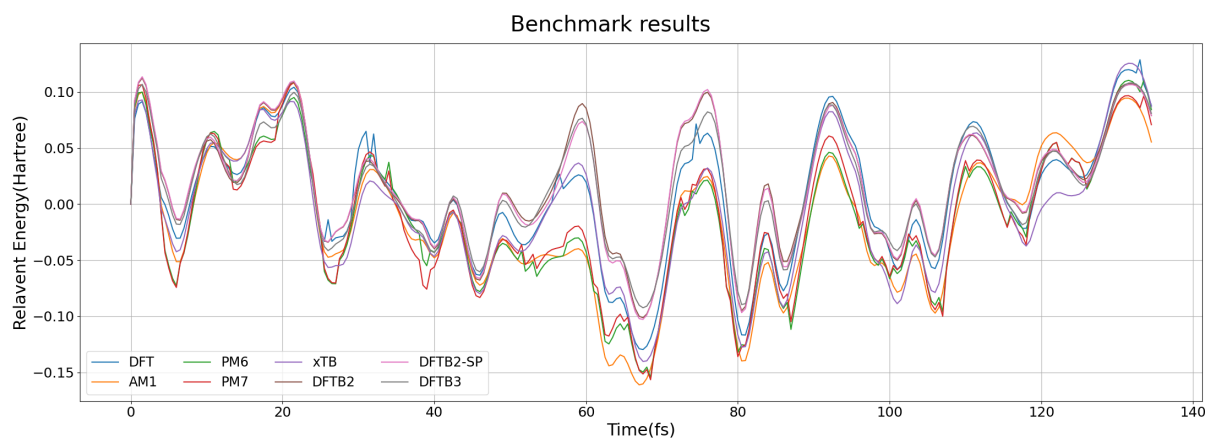

Figure S10: Carbon-6,Trajectory-1.



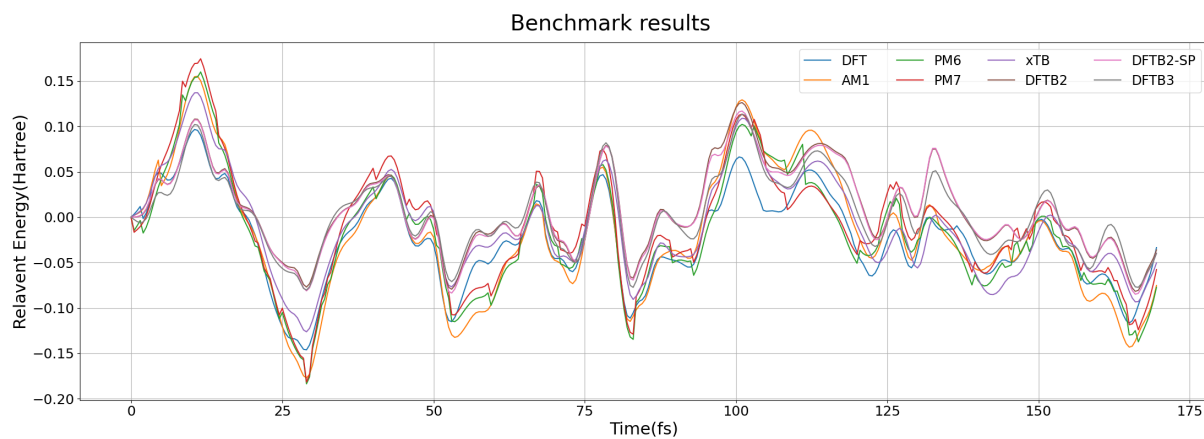

Figure S11: Carbon-6,Trajectory-2.

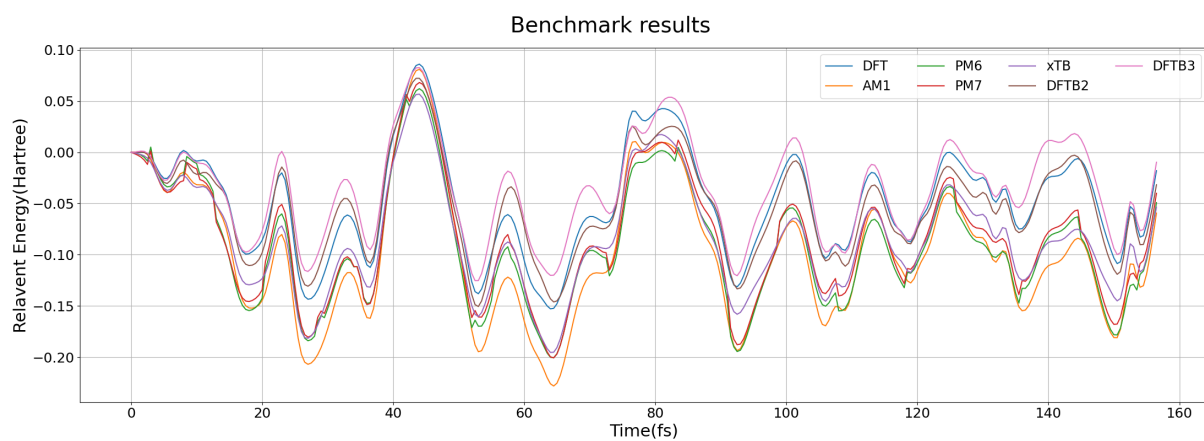

Figure S12: Carbon-6,Trajectory-3.

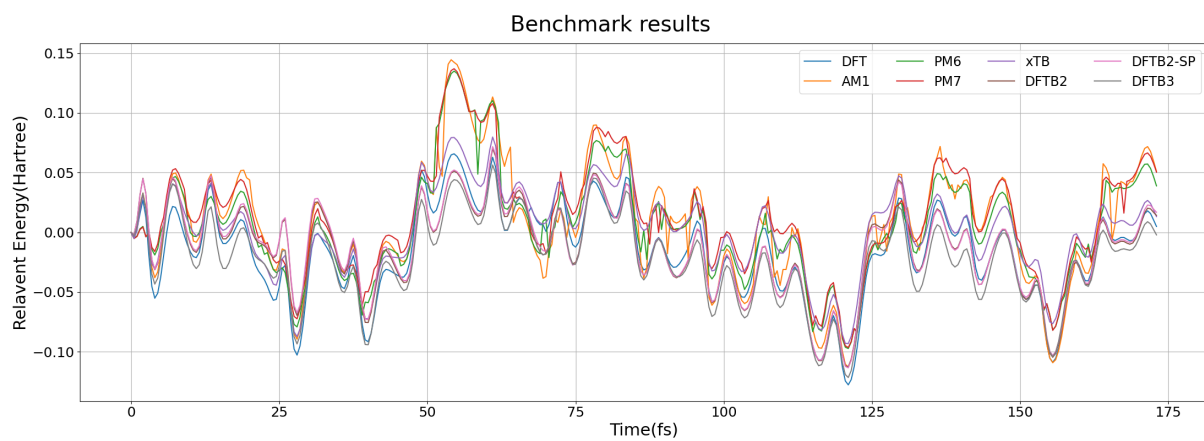

Figure S13: Carbon-6,Trajectory-4.

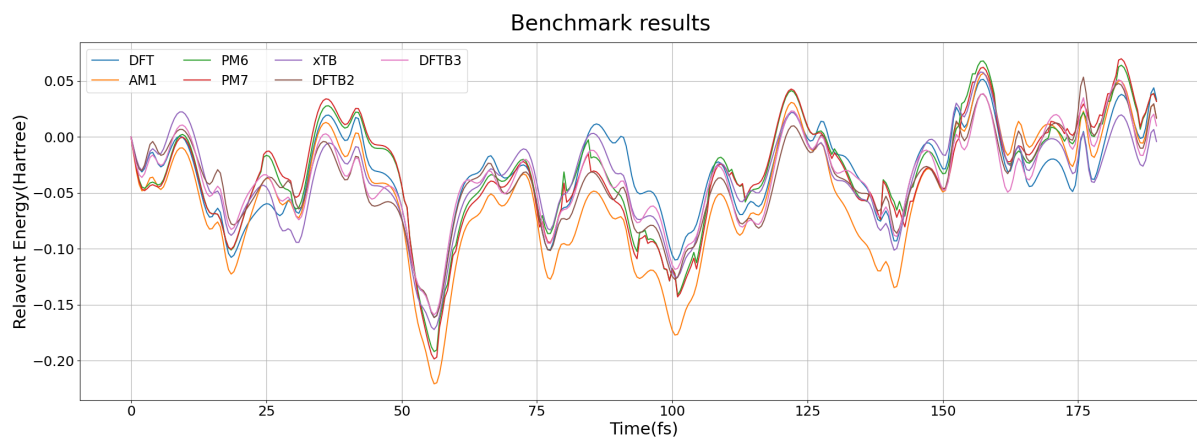

Figure S14: Carbon-6,Trajectory-5.

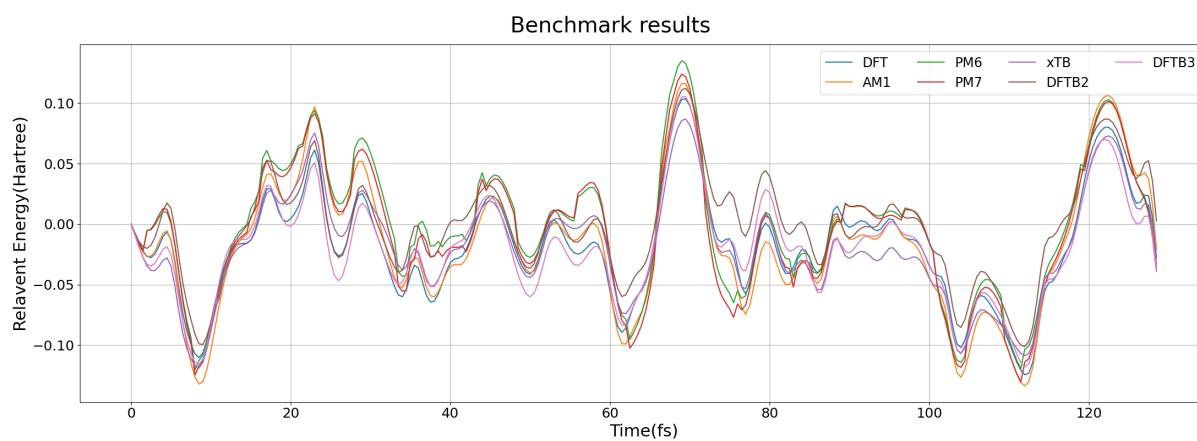

Figure S15: Carbon-6,Trajectory-6.

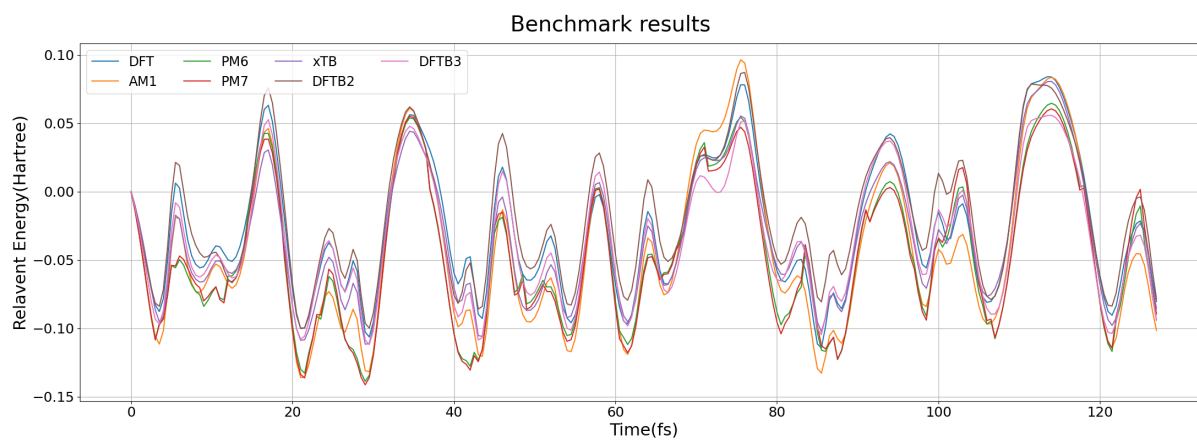

Figure S16: Carbon-6,Trajectory-7.

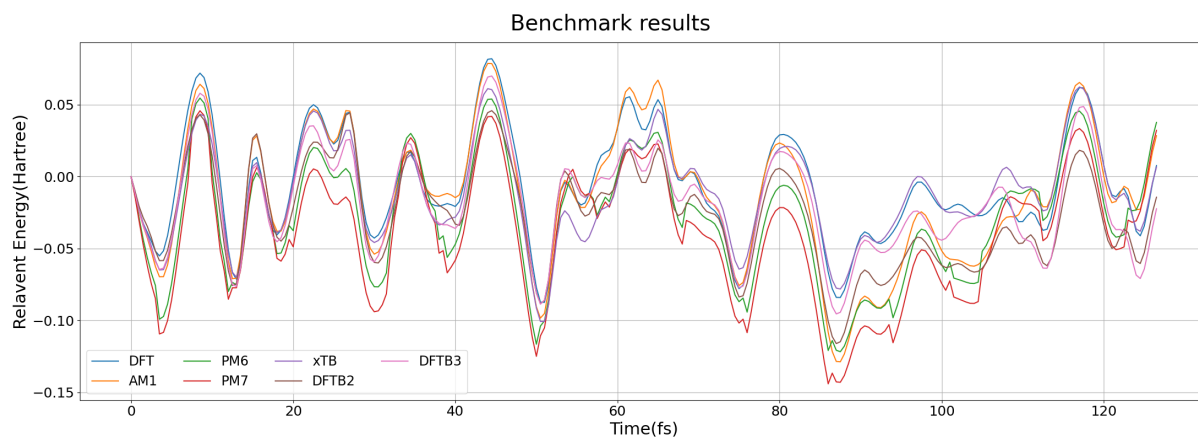

Figure S17: Carbon-6,Trajectory-8.

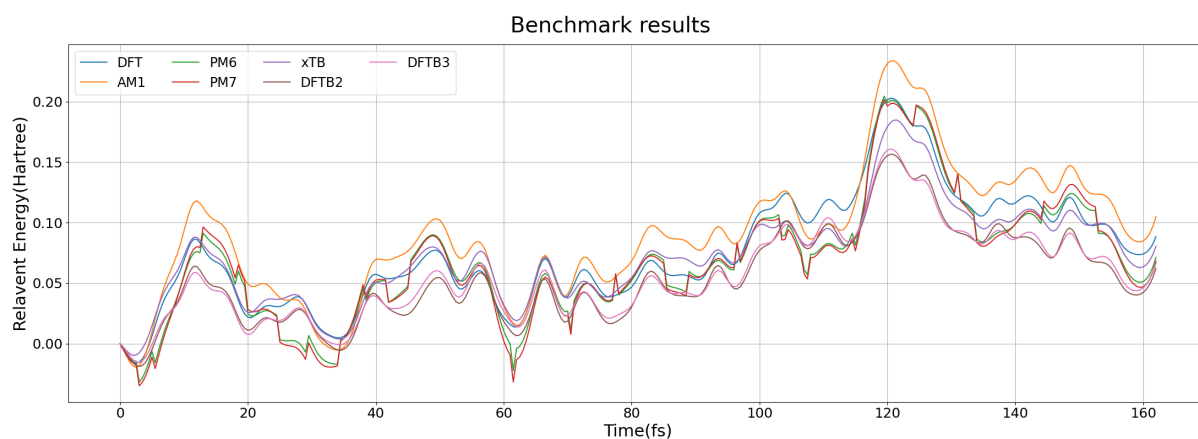

Figure S18: Carbon-6,Trajectory-9.

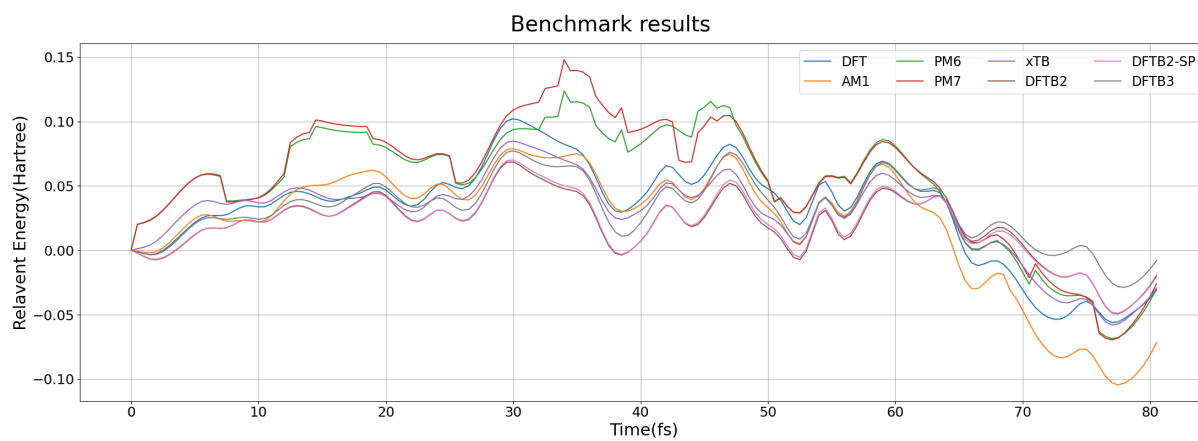

Figure S19: Carbon-6,Trajectory-10.

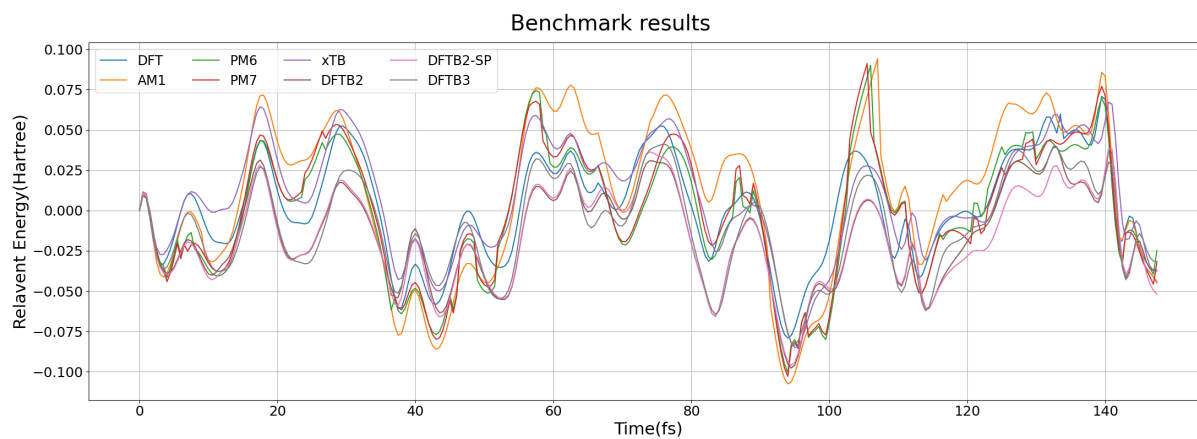

Figure S20: Carbon-6,Trajectory-11.

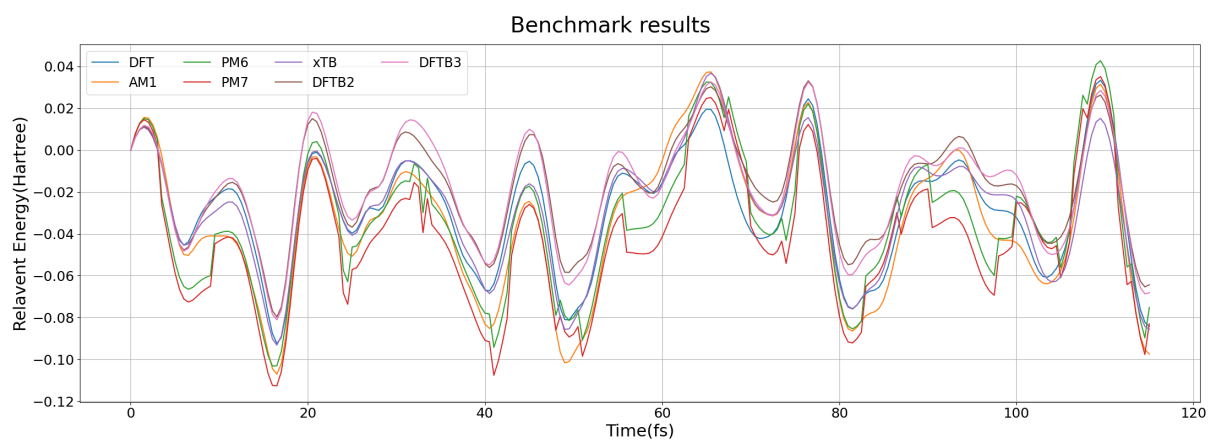

Figure S21: Carbon-6,Trajectory-12.

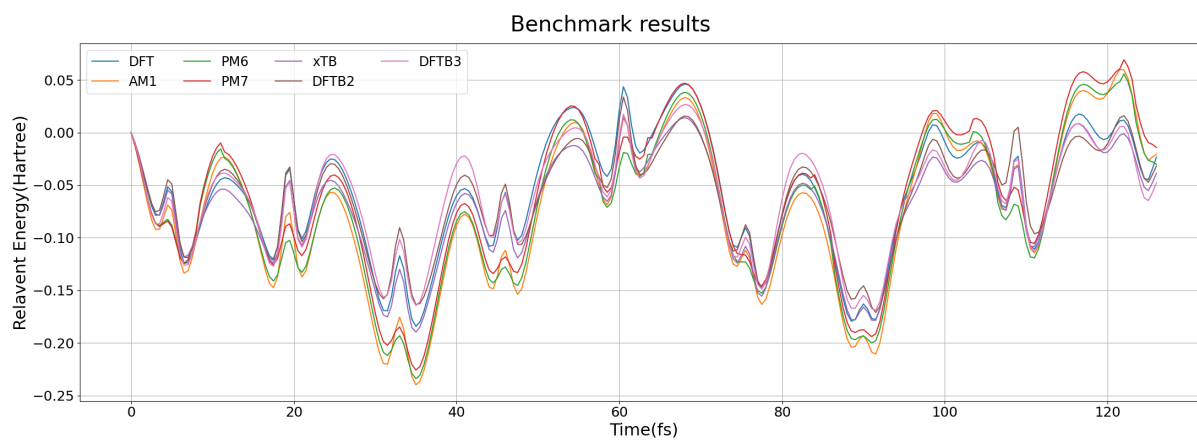

Figure S22: Carbon-6,Trajectory-13.

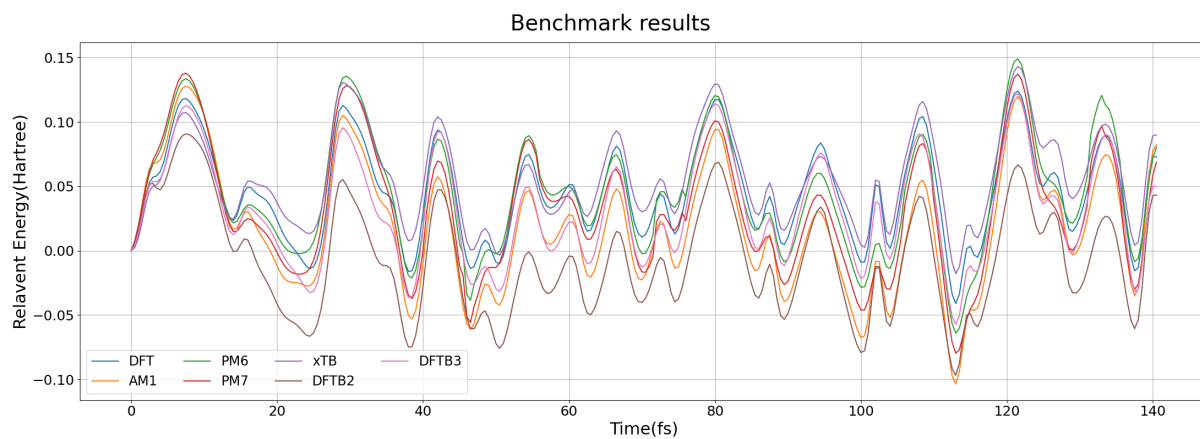

Figure S23: Carbon-6,Trajectory-14.

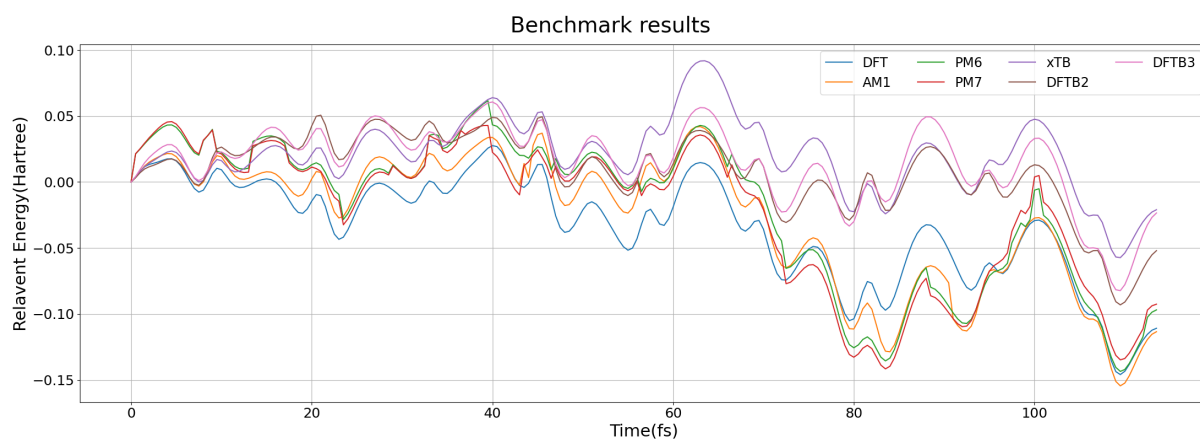

Figure S24: Carbon-6,Trajectory-15.

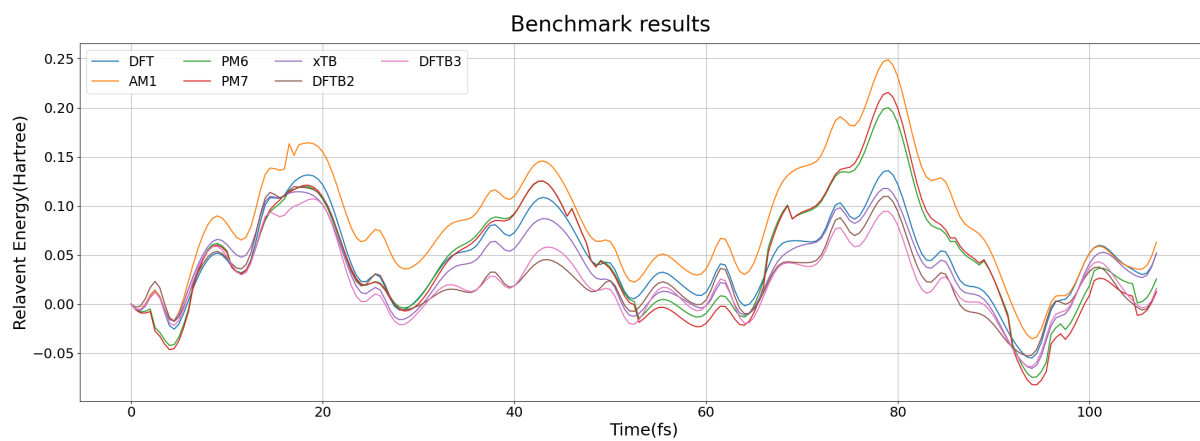

Figure S25: Carbon-6,Trajectory-16.

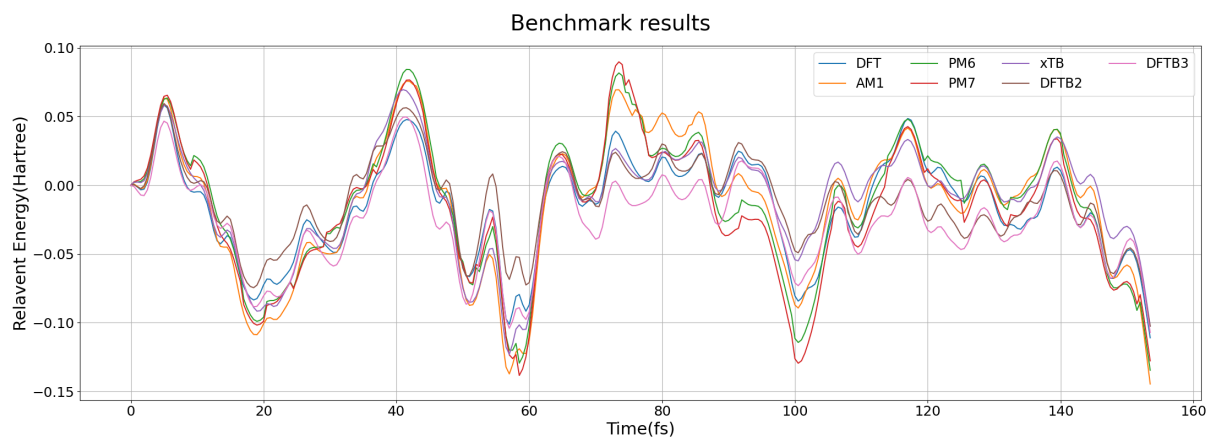

Figure S26: Carbon-6,Trajectory-17.

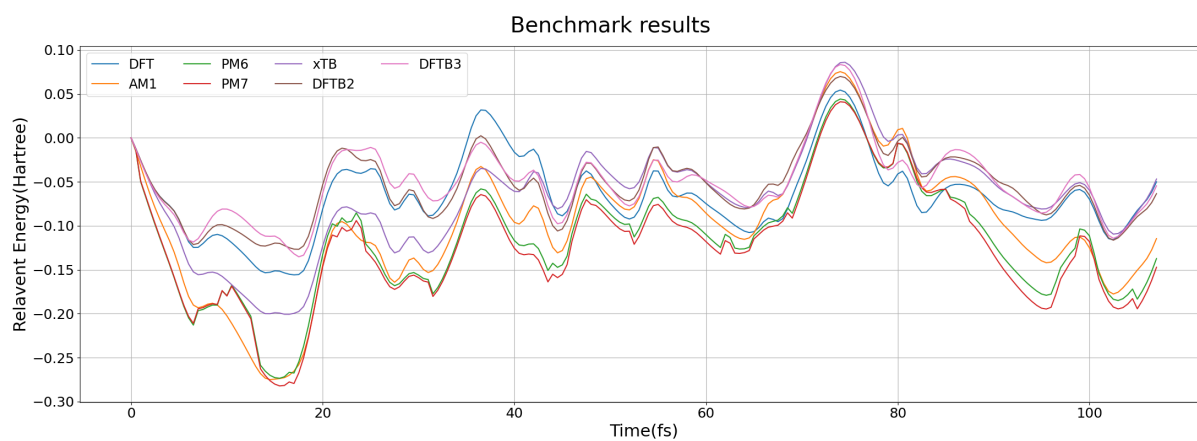

Figure S27: Carbon-6,Trajectory-18.

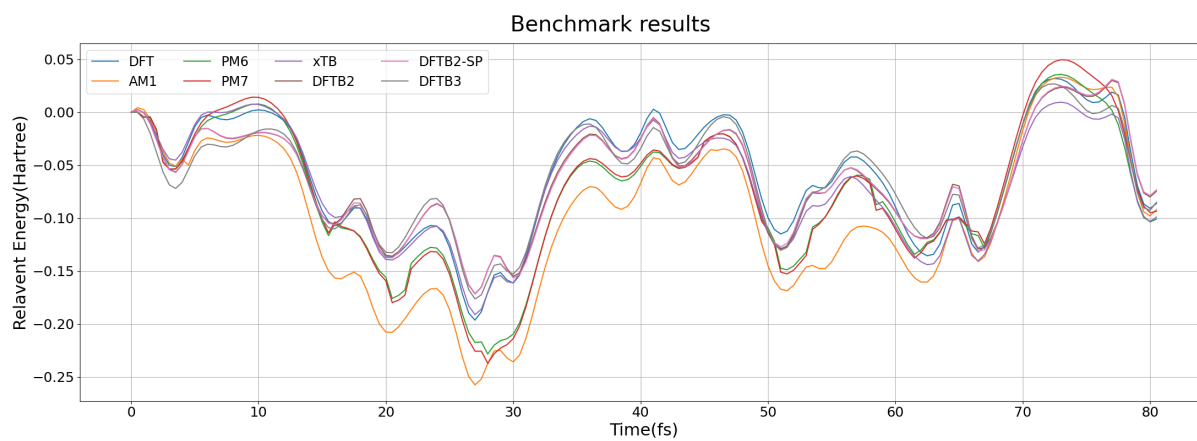

Figure S28: Carbon-7,Trajectory-1.

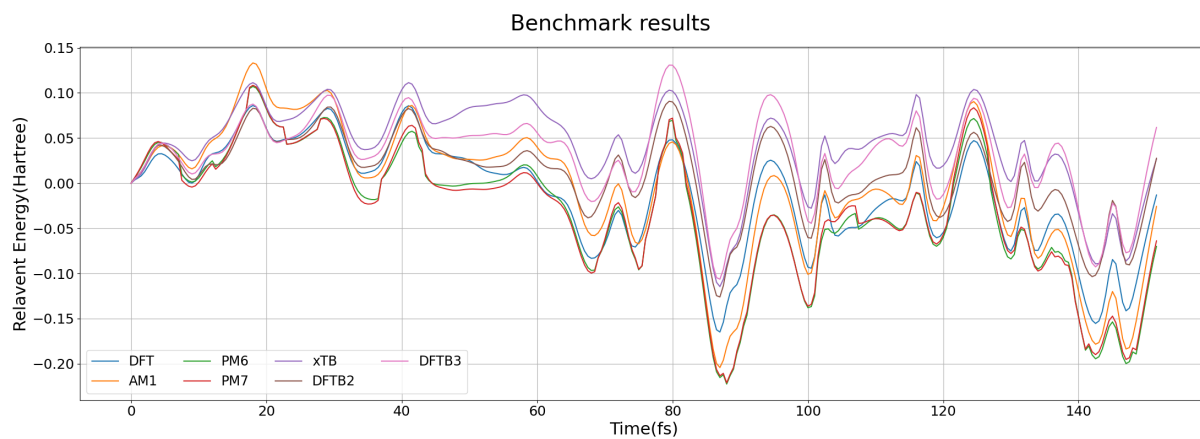

Figure S29: Carbon-7,Trajectory-2.

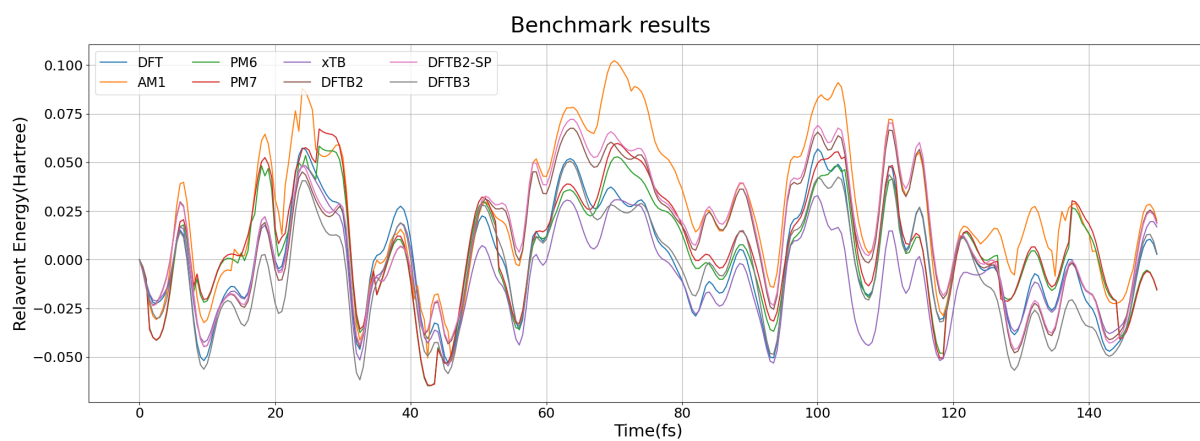

Figure S30: Carbon-7,Trajectory-3.

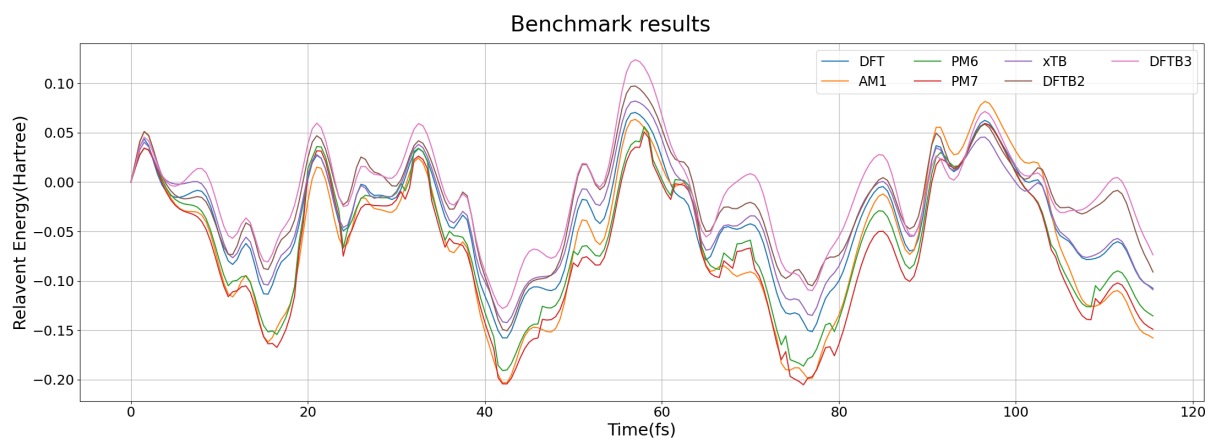

Figure S31: Carbon-7,Trajectory-4.



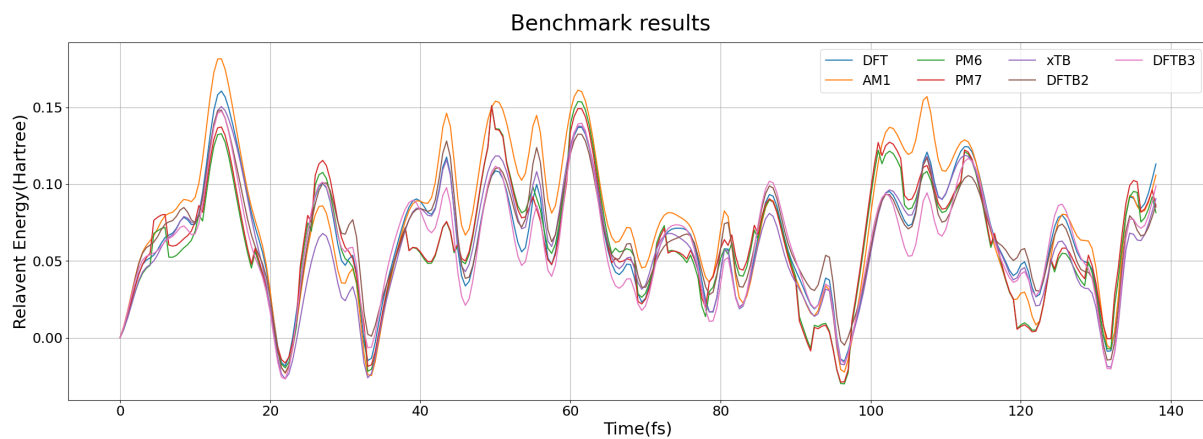

Figure S32: Carbon-7,Trajectory-5.

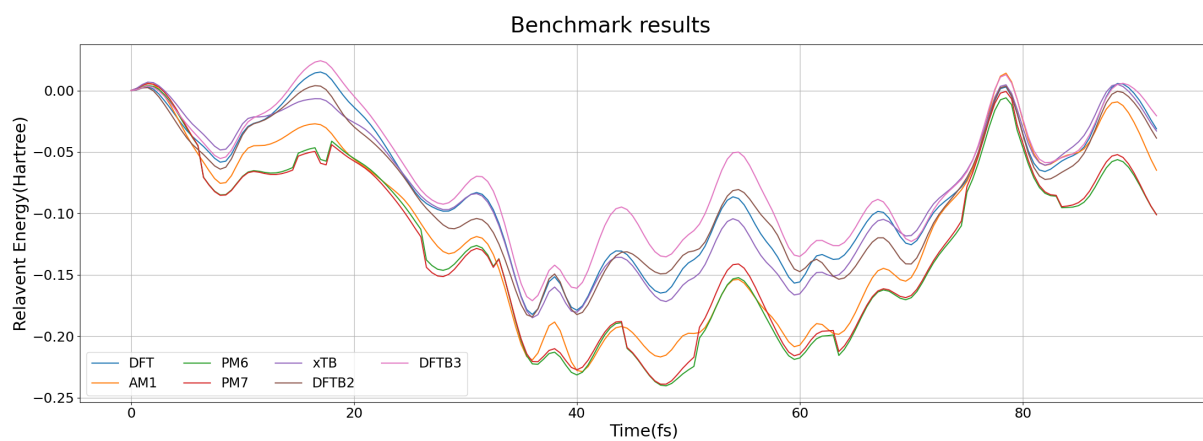

Figure S33: Carbon-7,Trajectory-6.

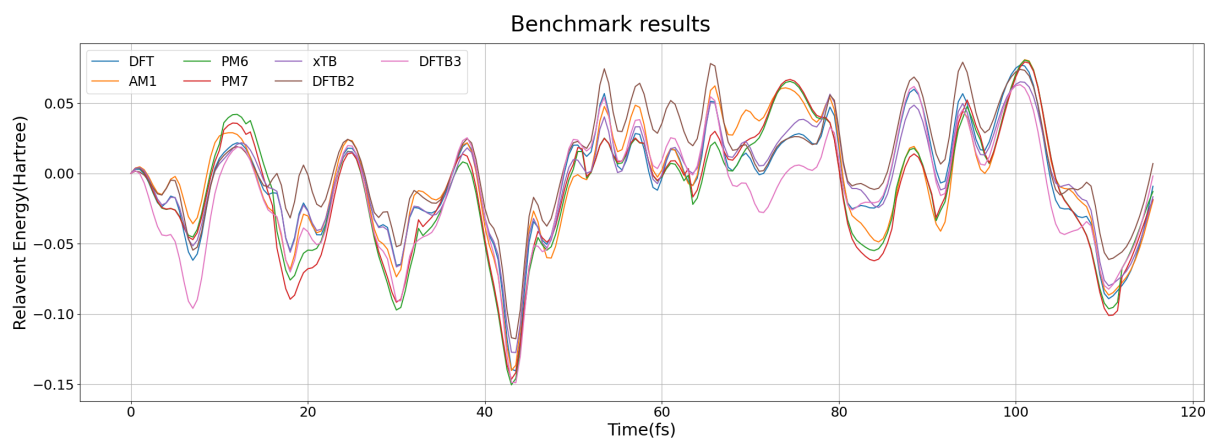

Figure S34: Carbon-7,Trajectory-7.

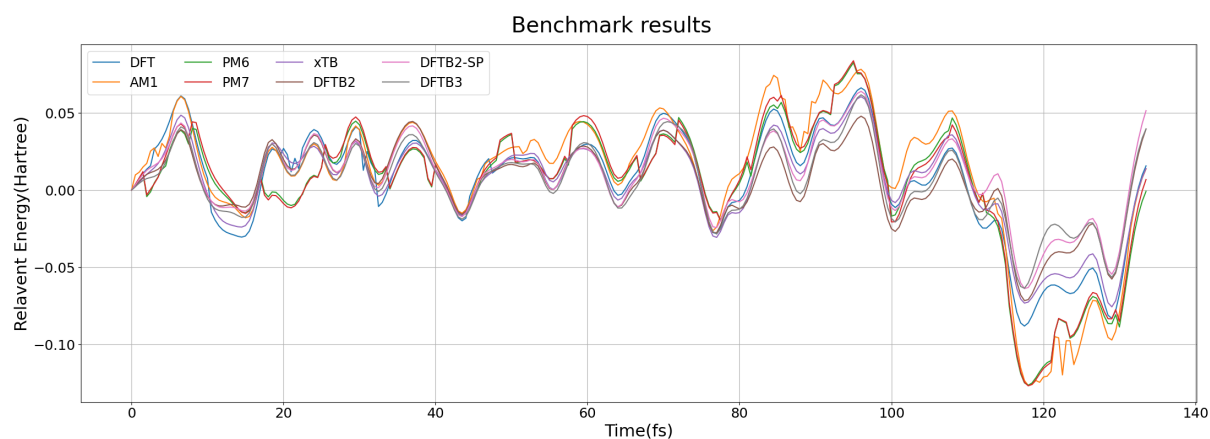

Figure S35: Carbon-7, Trajectory-8.

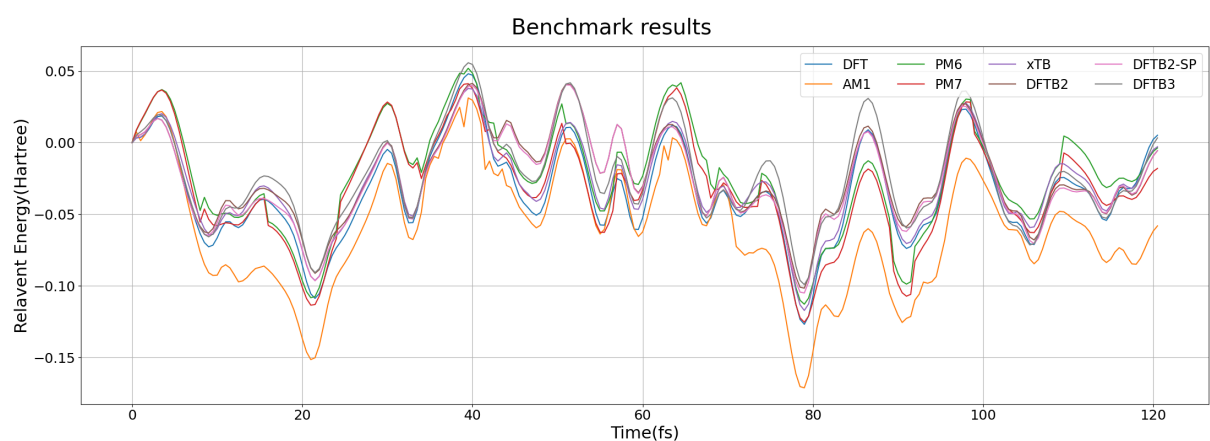

Figure S36: Carbon-7, Trajectory-9.

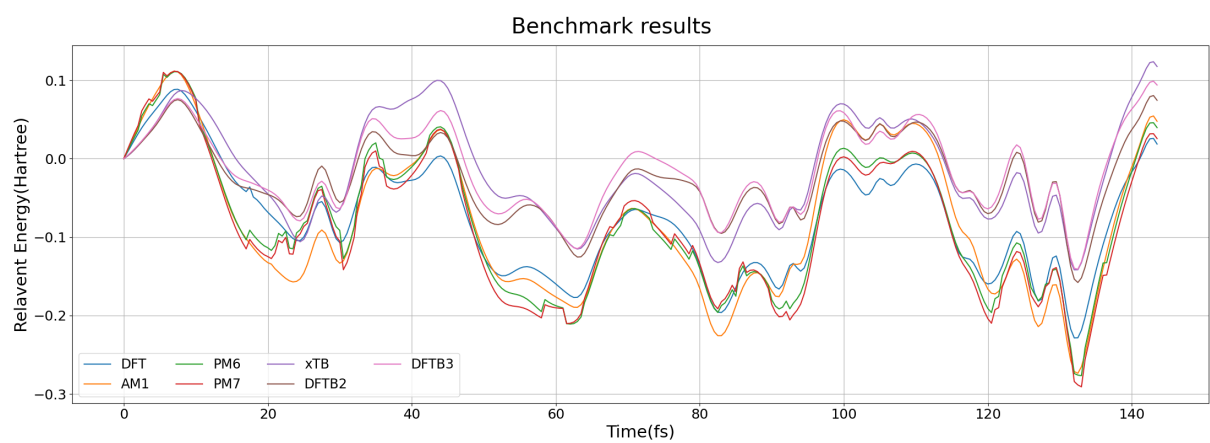

Figure S37: Carbon-8, Trajectory-1.

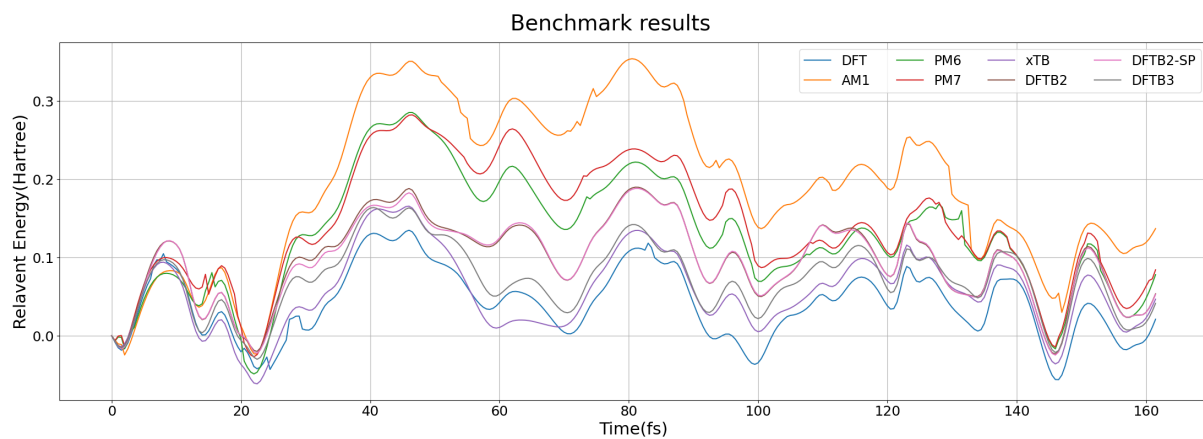

Figure S38: Carbon-8,Trajectory-2.

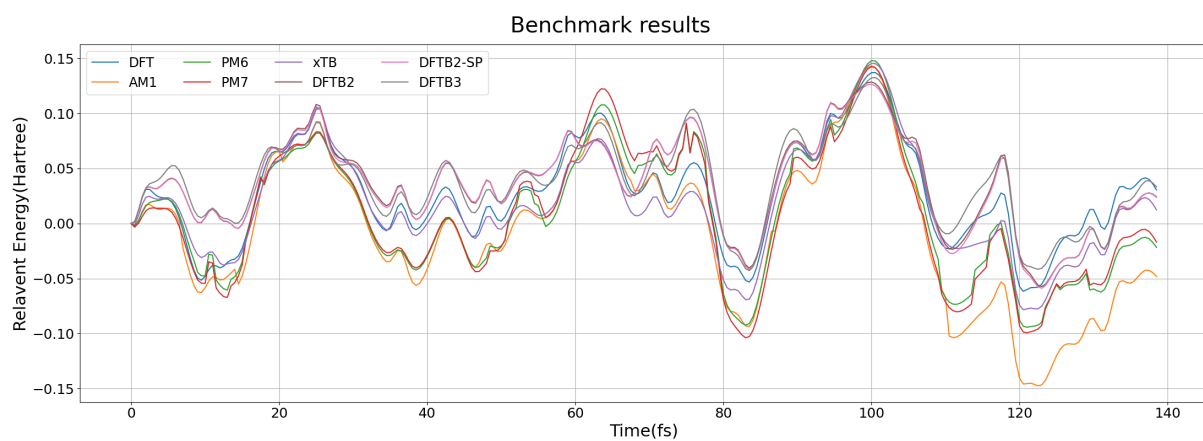

Figure S39: Carbon-8,Trajectory-3.

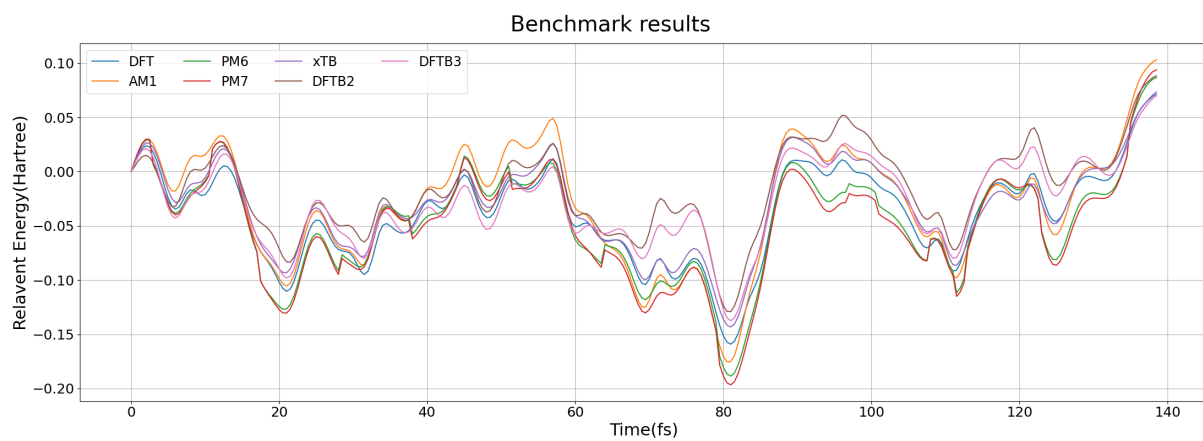

Figure S40: Carbon-8,Trajectory-4.

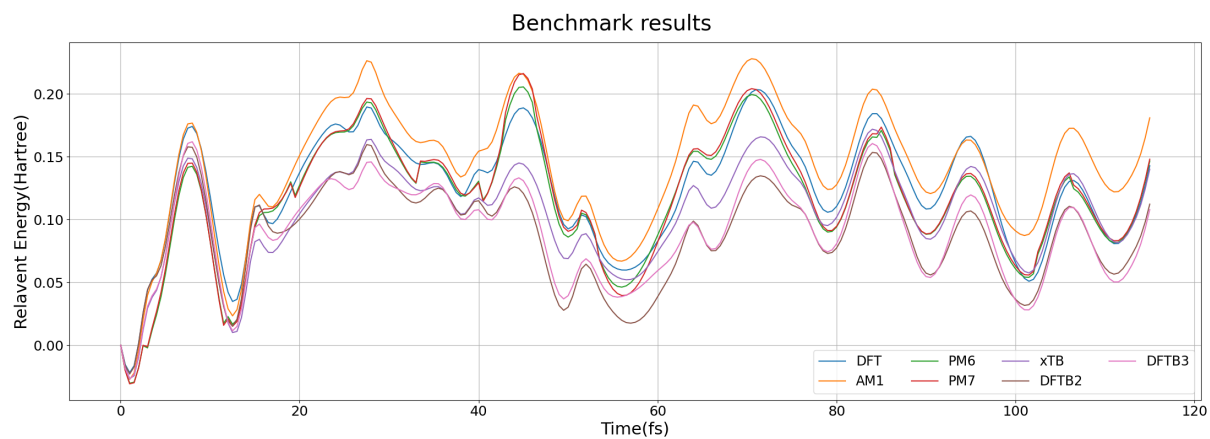

Figure S41: Carbon-8,Trajectory-5.

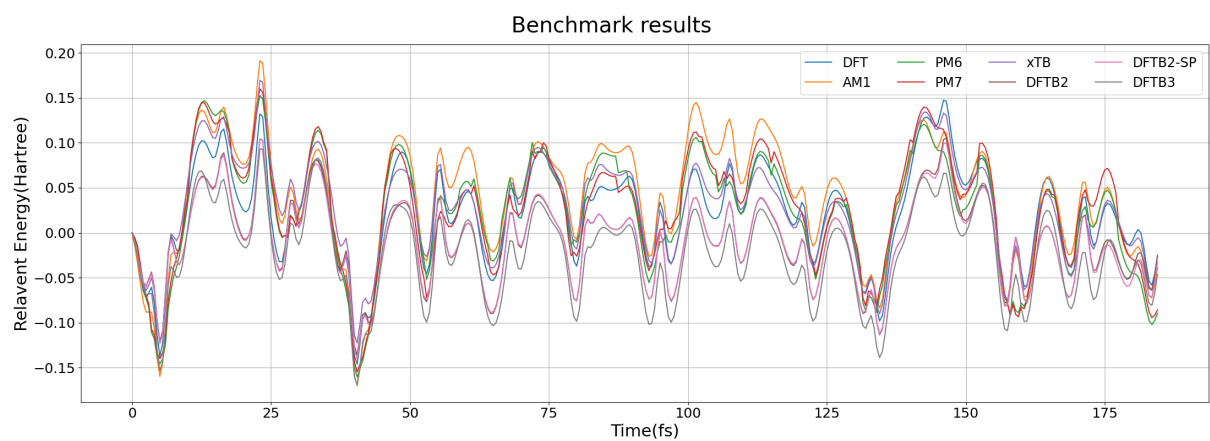

Figure S42: Carbon-8,Trajectory-6.

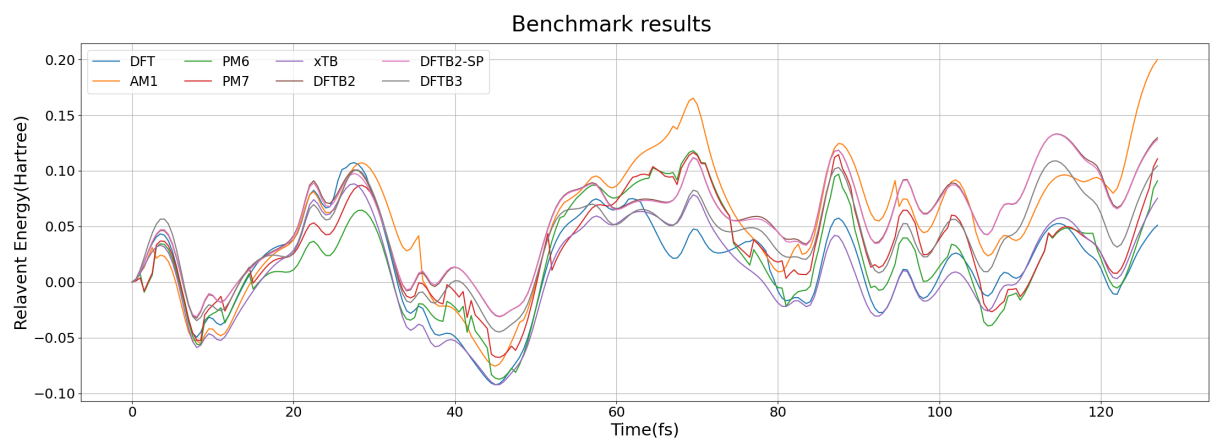

Figure S43: Carbon-8,Trajectory-7.

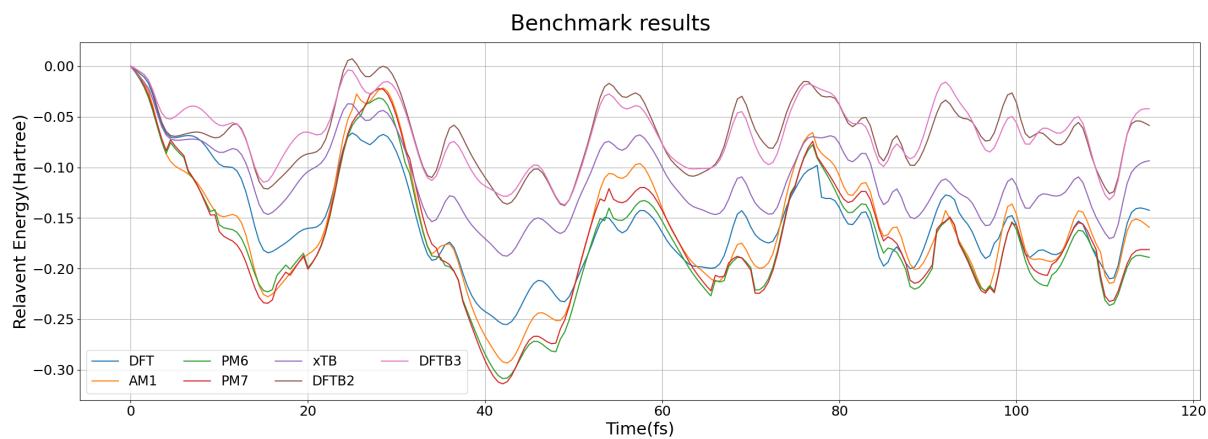

Figure S44: Carbon-10,Trajectory-1.

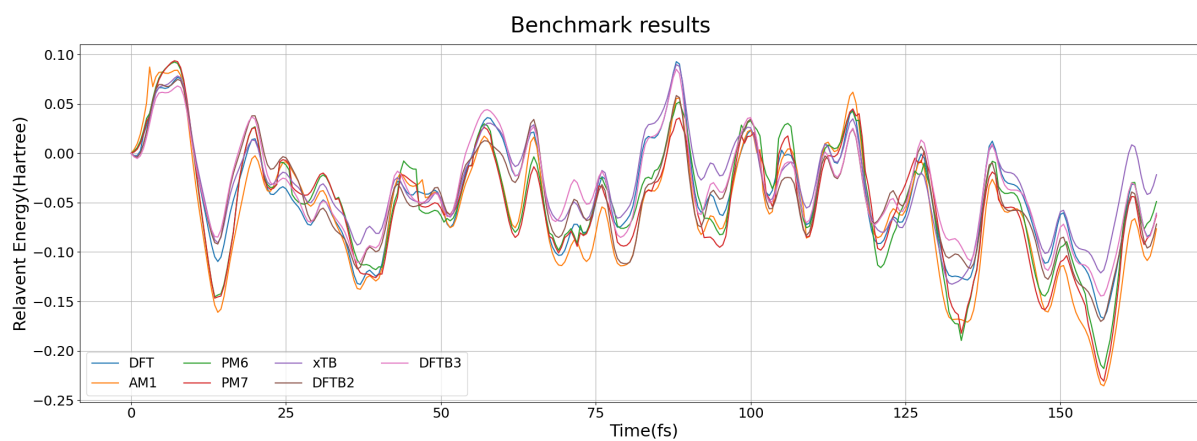

Figure S45: Carbon-10,Trajectory-2.

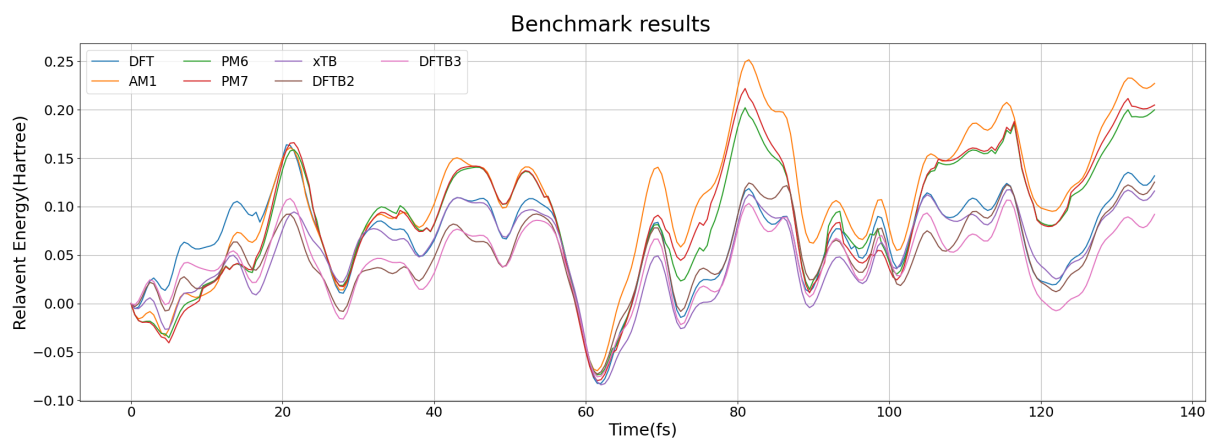

Figure S46: Carbon-10,Trajectory-3.

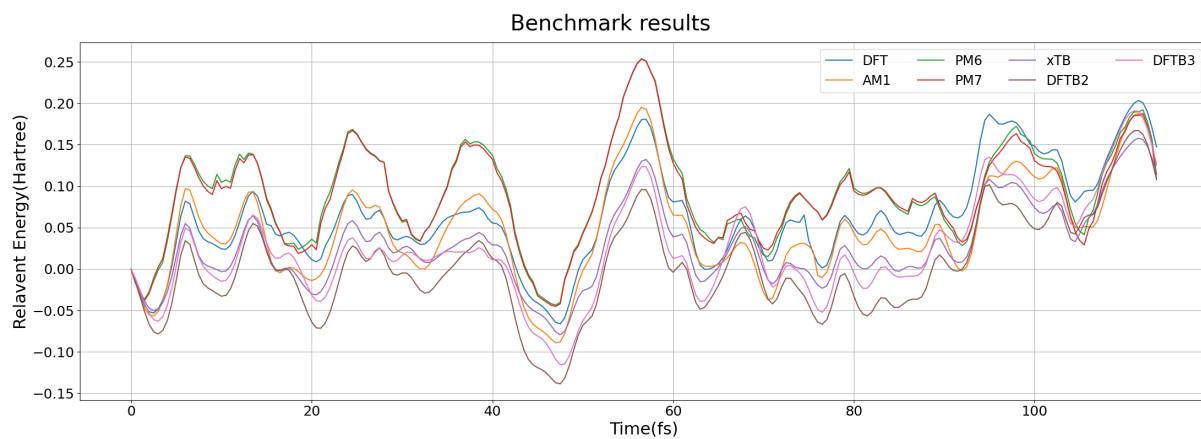

Figure S47: Carbon-10,Trajectory-4.

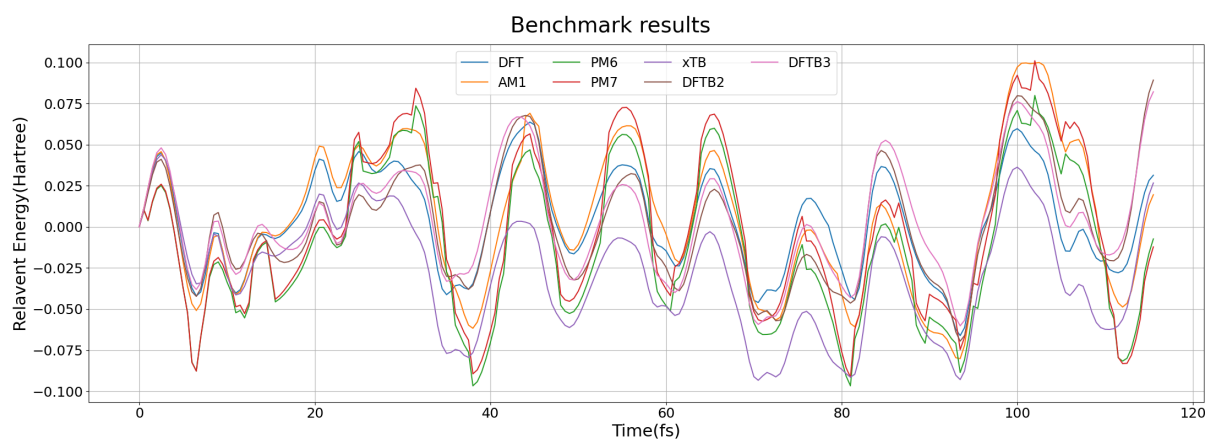

Figure S48: Carbon-10,Trajectory-5.

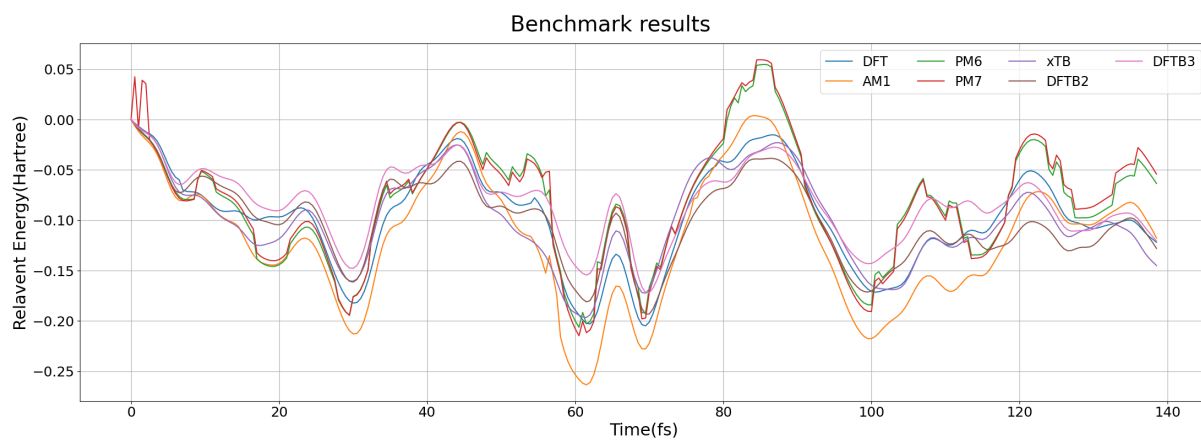

Figure S49: Carbon-10,Trajectory-6.

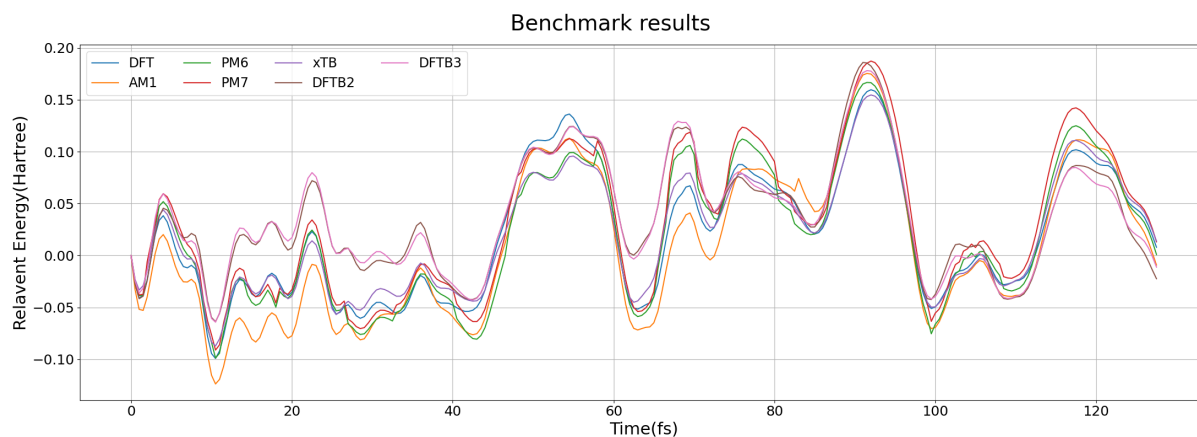

Figure S50: Carbon-10,Oxygen-1,Trajectory-7.

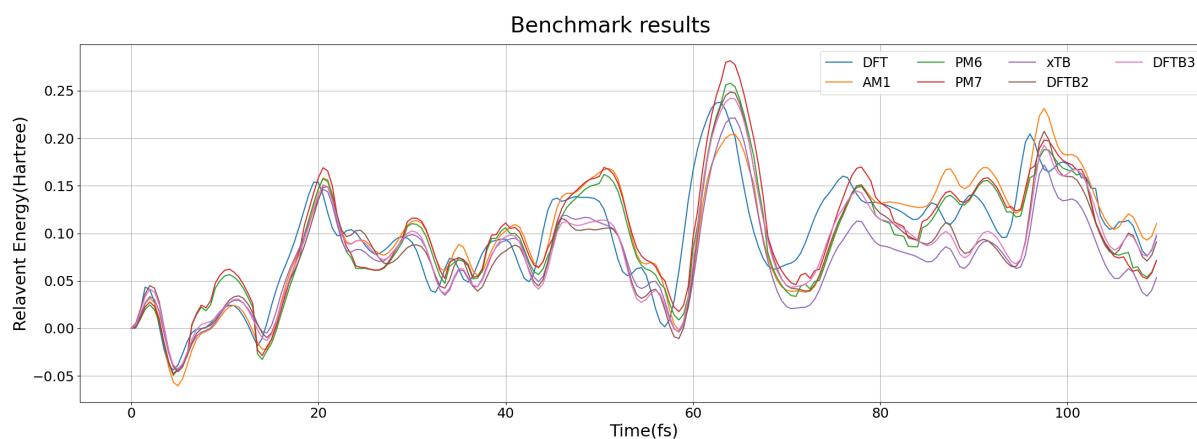

Figure S51: Carbon-11,Trajectory-1.

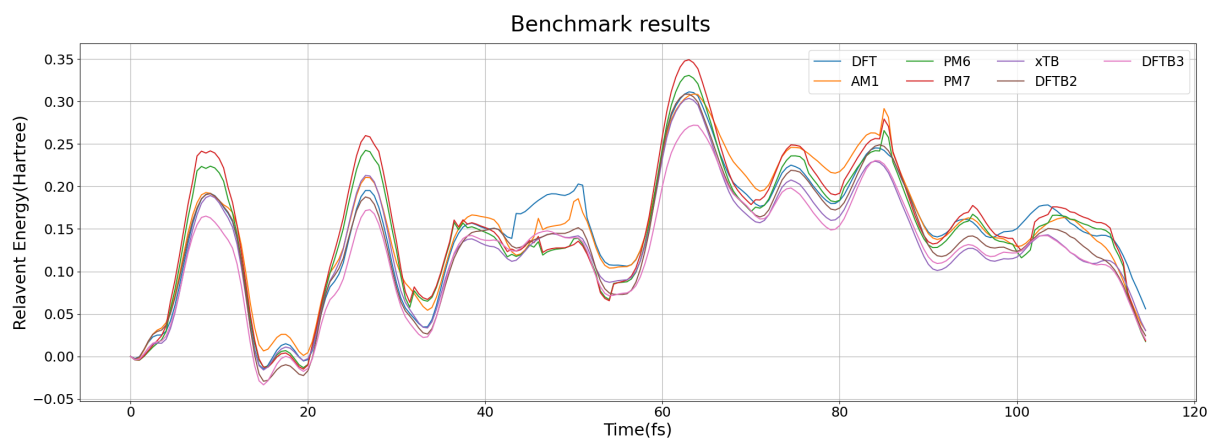

Figure S52: Carbon-11,Trajectory-2.



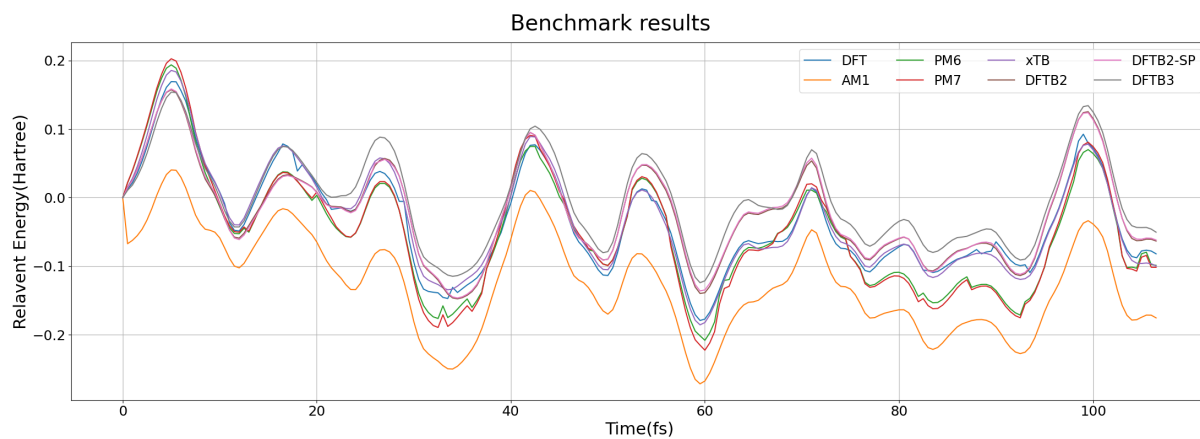

Figure S53: Carbon-11,Trajectory-3.

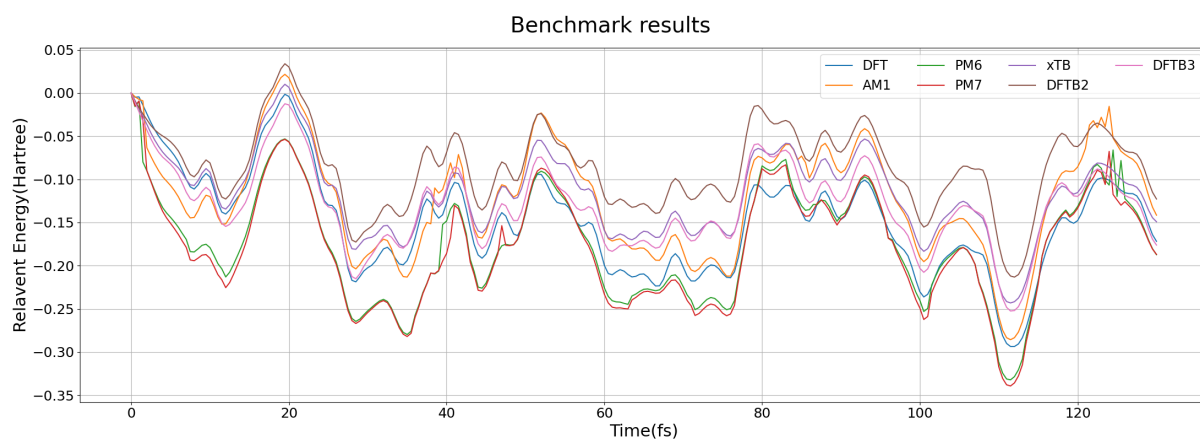

Figure S54: Carbon-11,Trajectory-4.

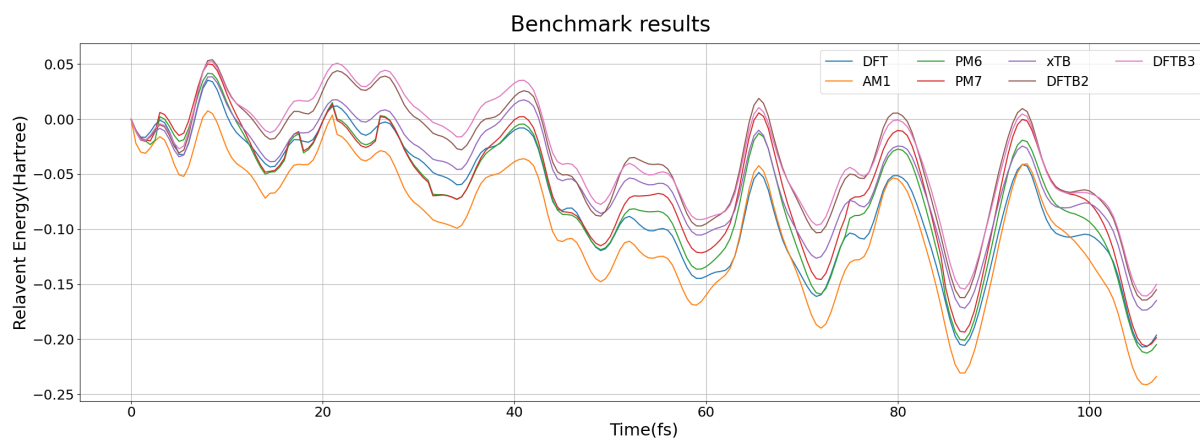

Figure S55: Carbon-11,Trajectory-5.

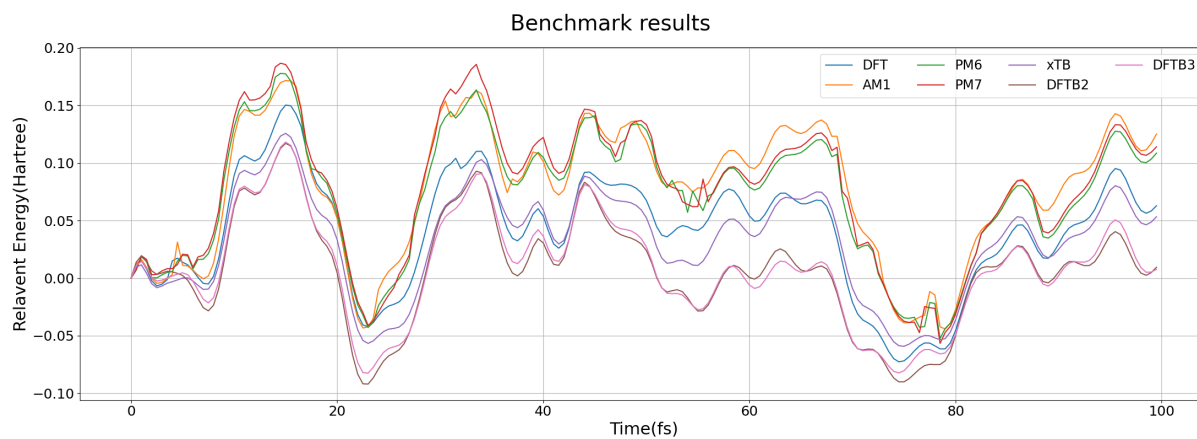

Figure S56: Carbon-12,Trajectory-1.

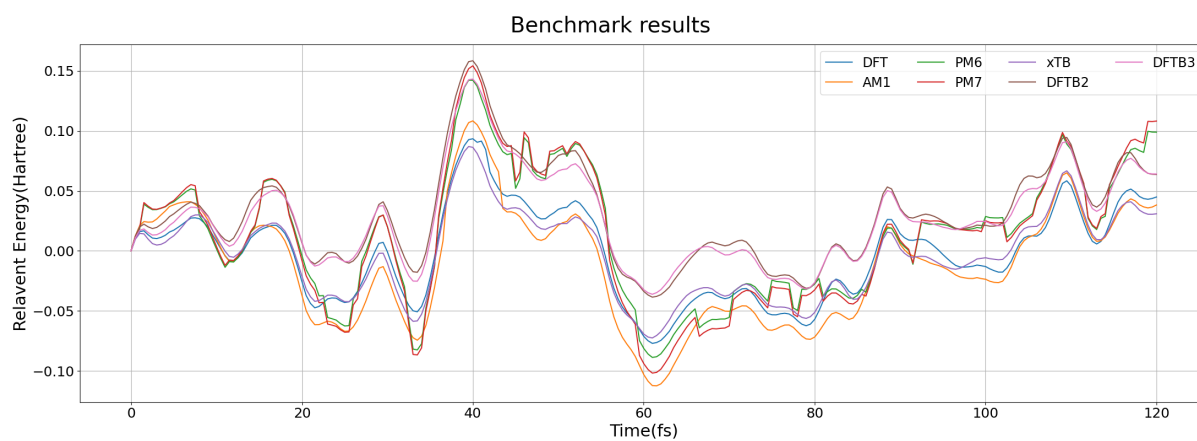

Figure S57: Carbon-12,Oxygen-1,Trajectory-2.

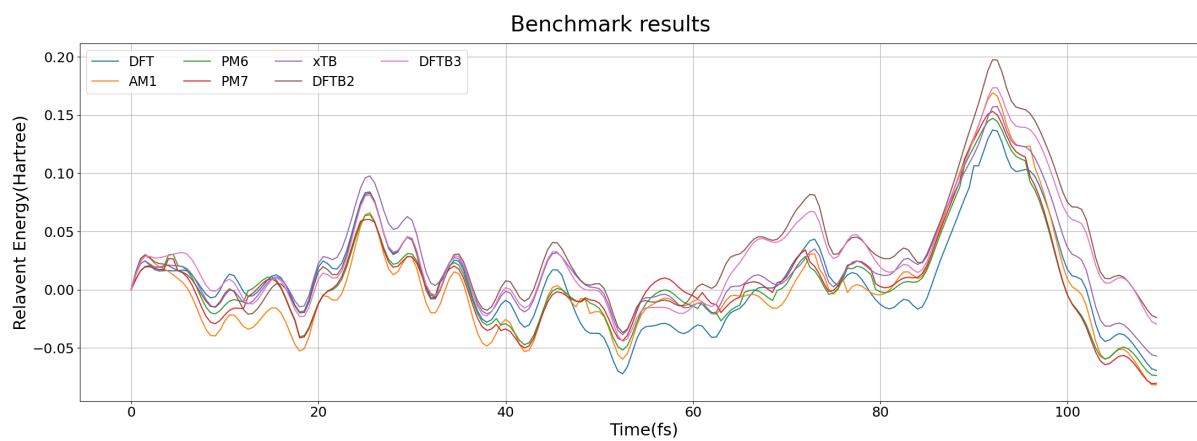

Figure S58: Carbon-12,Trajectory-3.

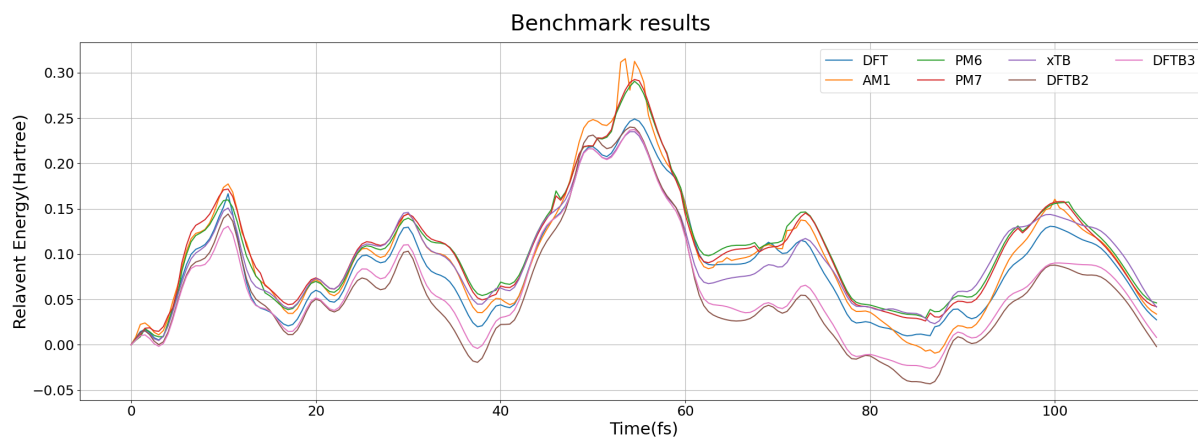

Figure S59: Carbon-12,Trajectory-4.

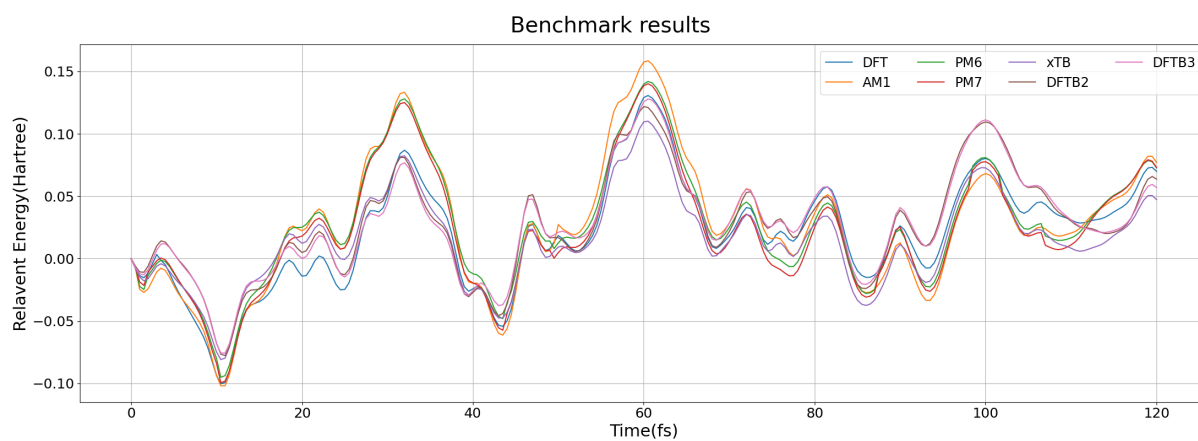

Figure S60: Carbon-12,Trajectory-5.

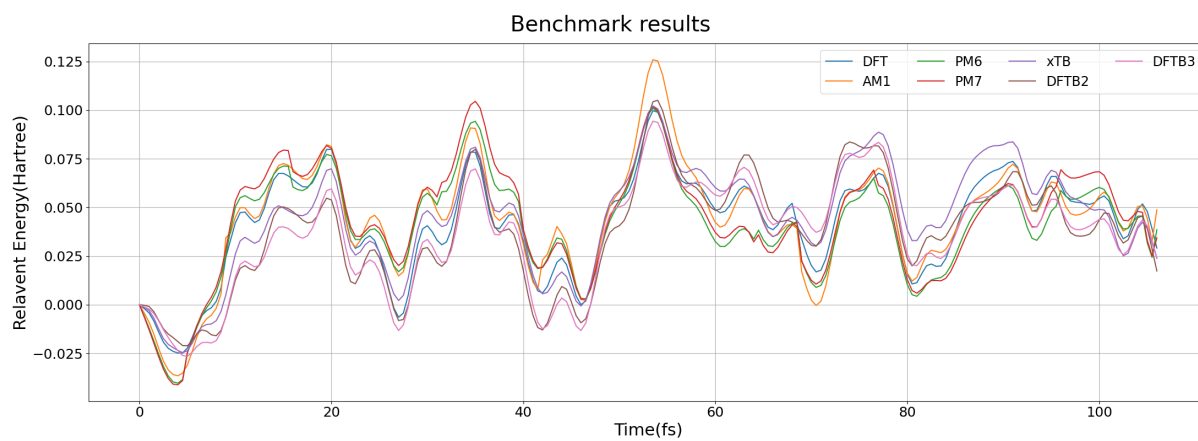

Figure S61: Carbon-12,Trajectory-6.

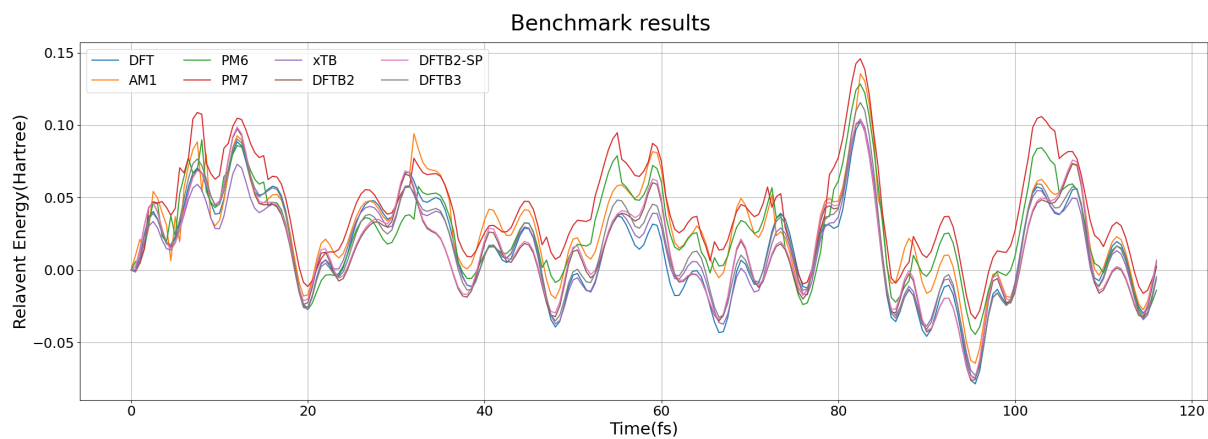

Figure S62: Carbon-12,Trajectory-7.

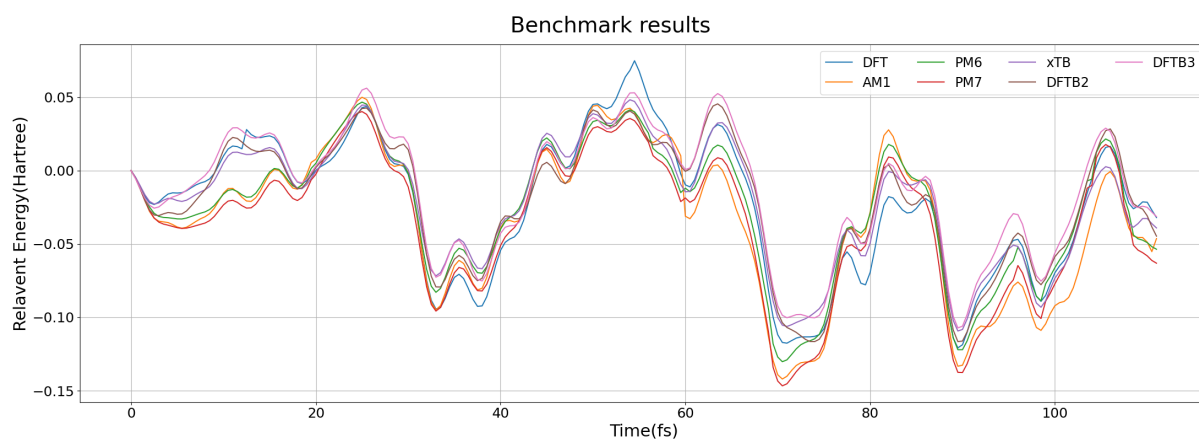

Figure S63: Carbon-14,Trajectory-1.

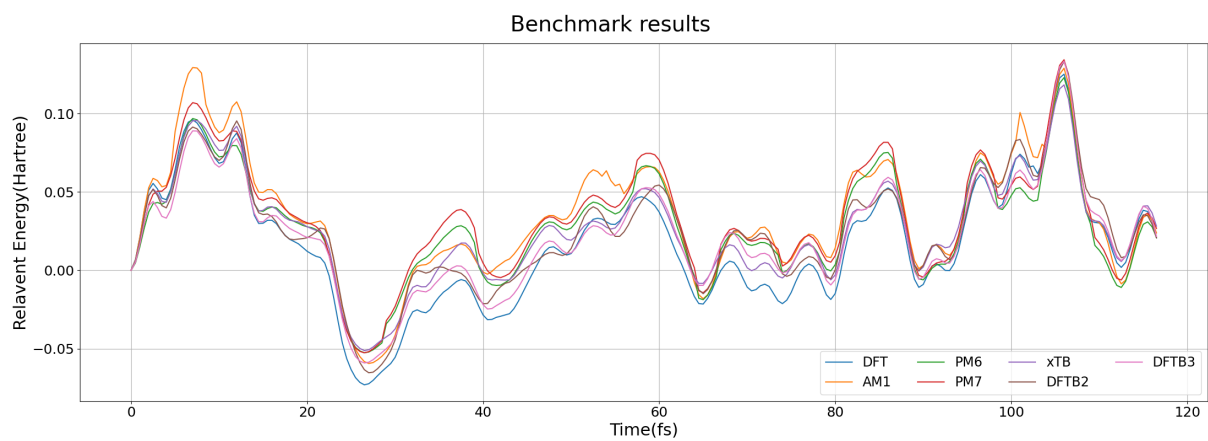

Figure S64: Carbon-15,Trajectory-1.

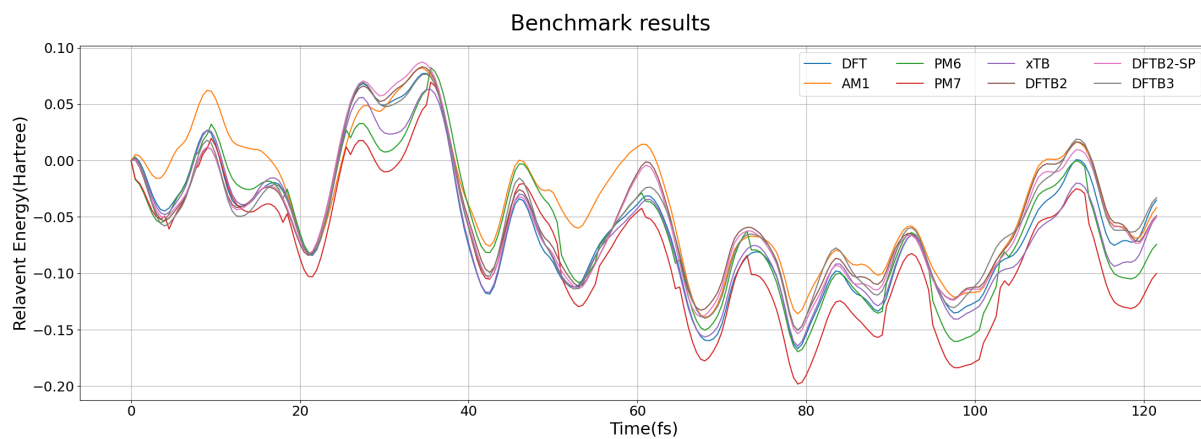

Figure S65: Carbon-16,Trajectory-1.

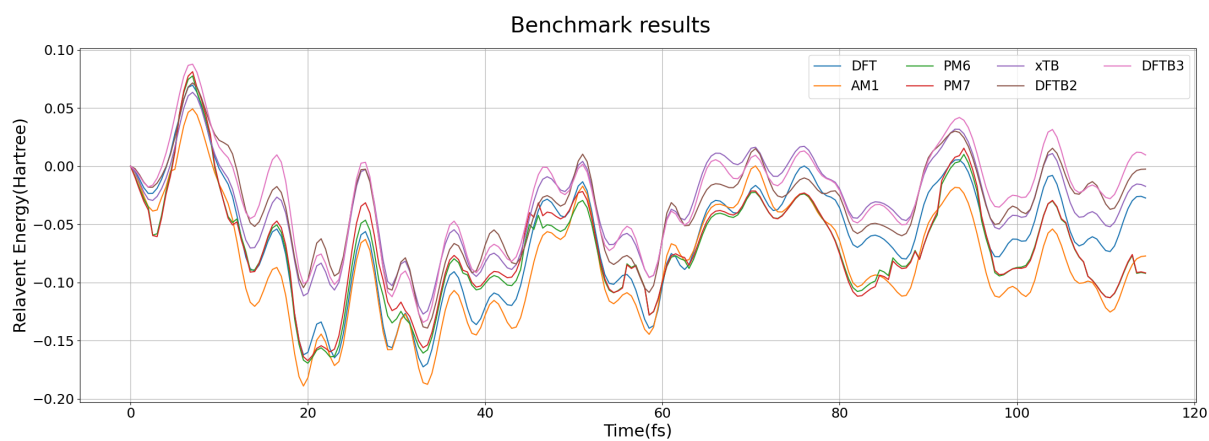

Figure S66: Carbon-16,Trajectory-2.

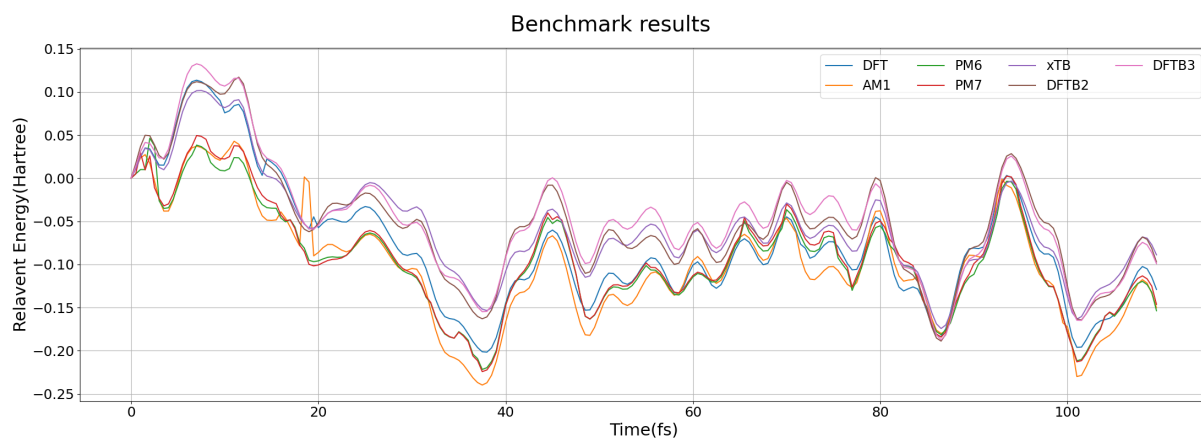

Figure S67: Carbon-16,Trajectory-3.

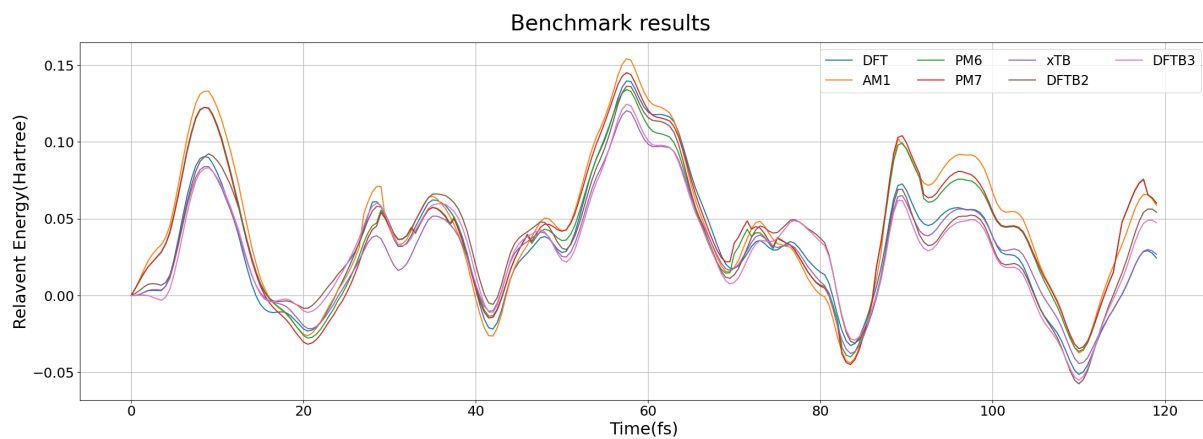

Figure S68: Carbon-16,Trajectory-4.

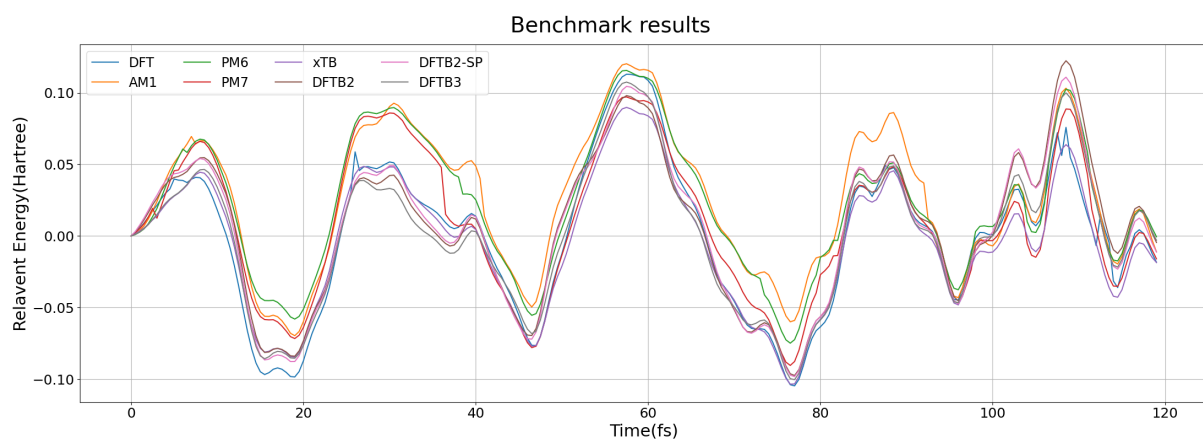

Figure S69: Carbon-16,Trajectory-5.

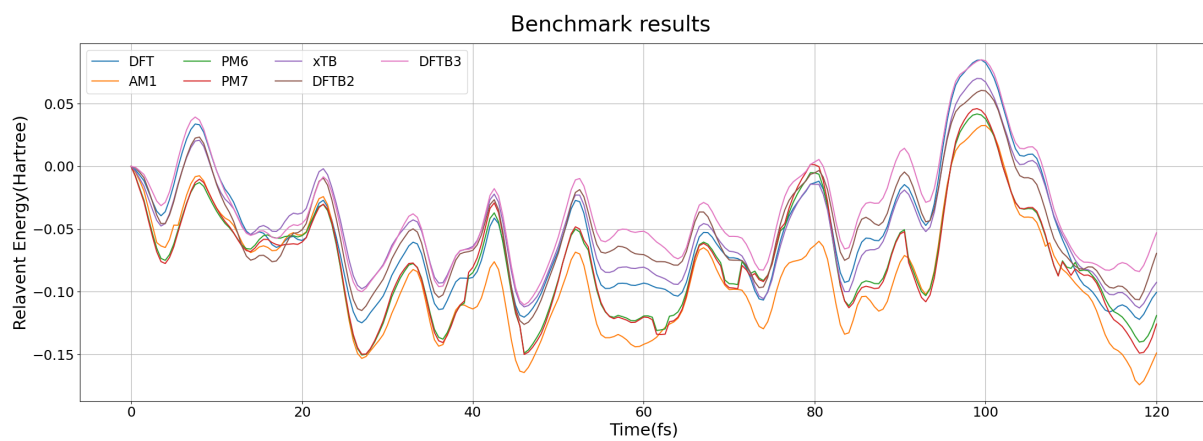

Figure S70: Carbon-17,Trajectory-1.

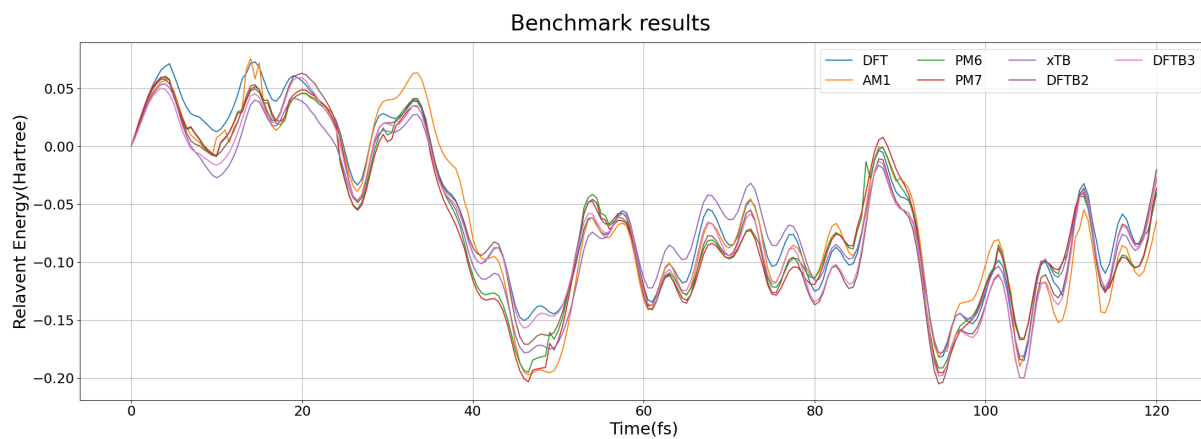

Figure S71: Carbon-17,Trajectory-2.

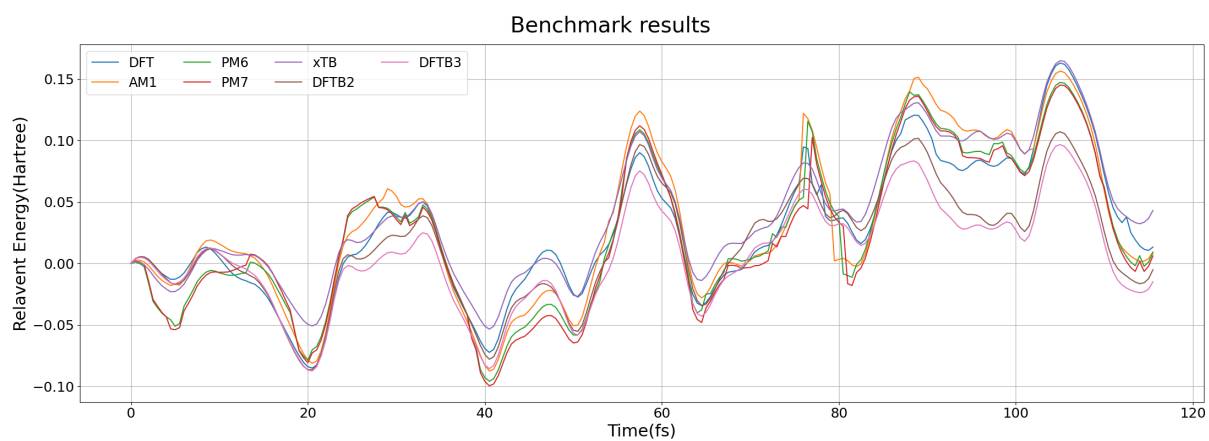

Figure S72: Carbon-17,Trajectory-3.

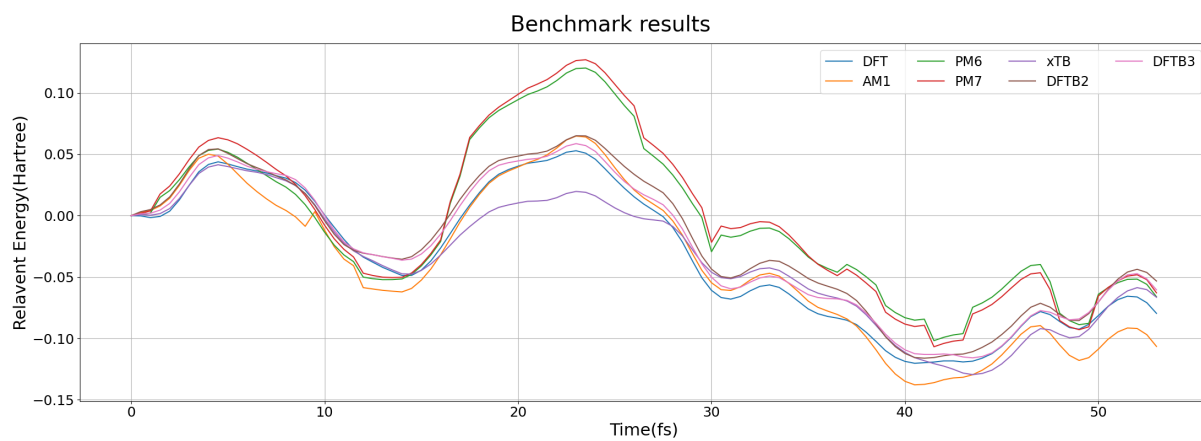

Figure S73: Carbon-17,Oxygen-1,Trajectory-4.



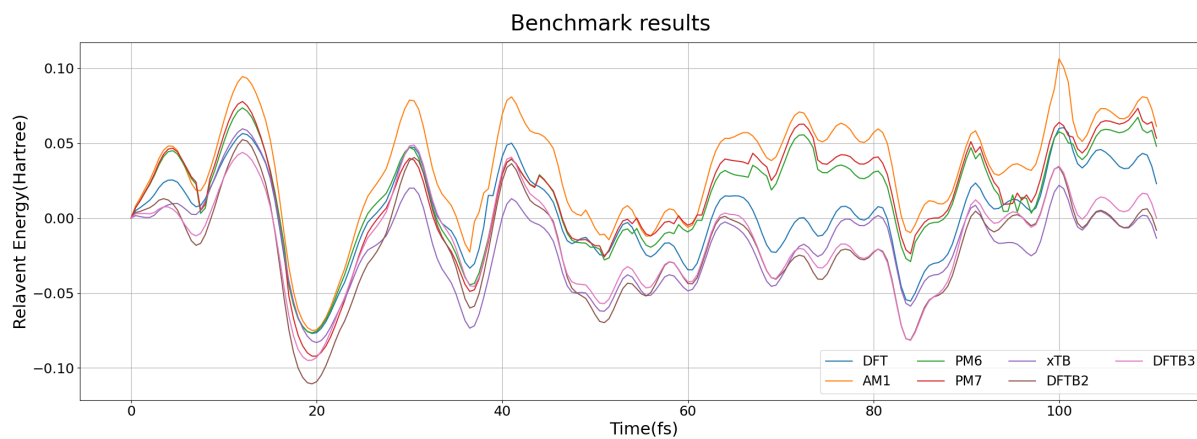

Figure S74: Carbon-17,Trajectory-5.

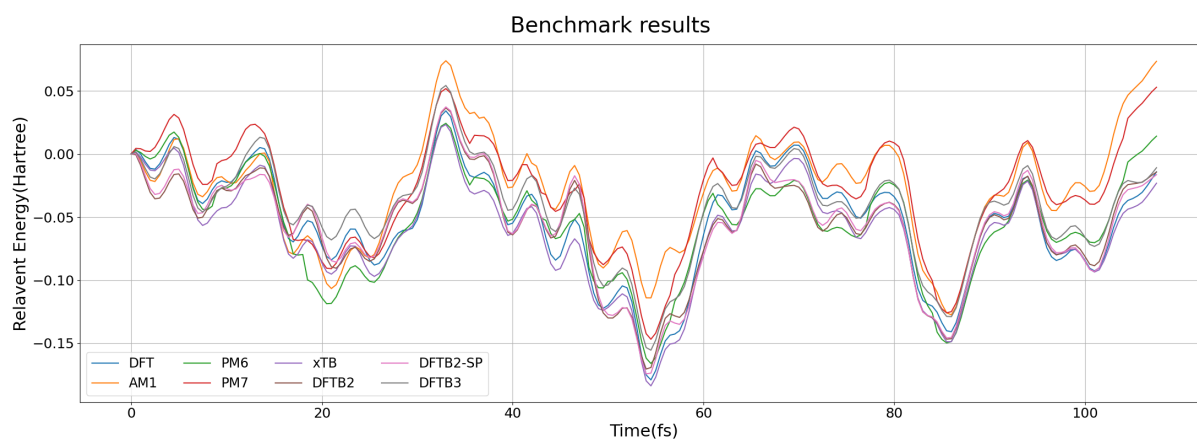

Figure S75: Carbon-17,Trajectory-6.

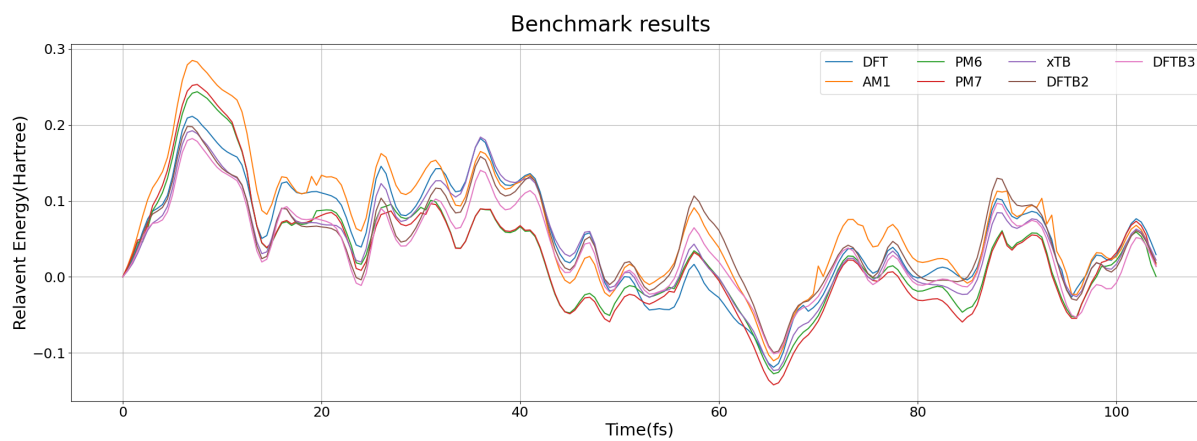

Figure S76: Carbon-19,Trajectory-1.

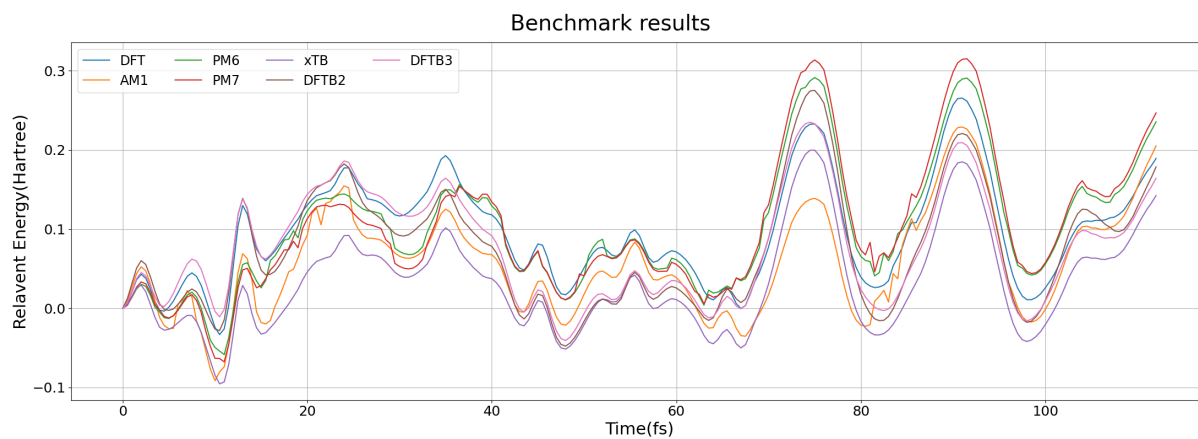

Figure S77: Carbon-19,Trajectory-2.

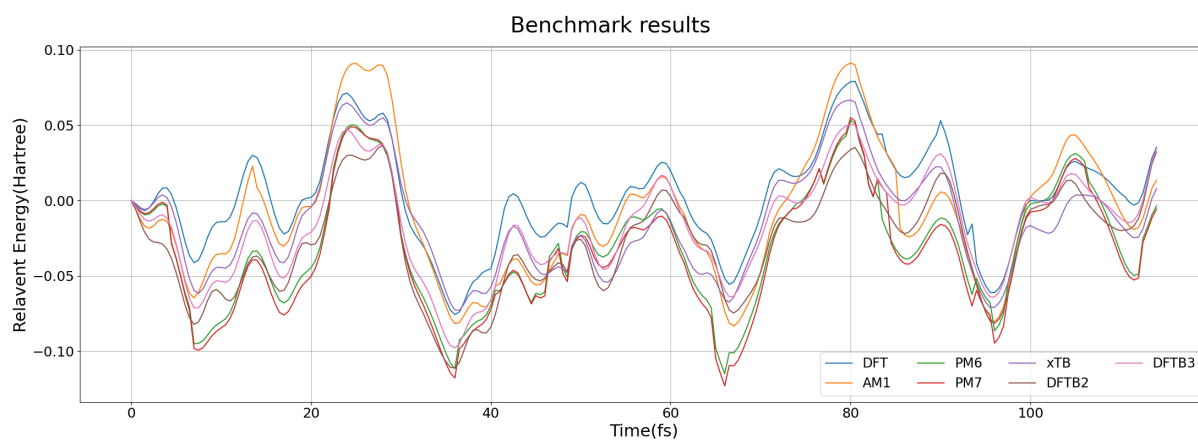

Figure S78: Carbon-19,Trajectory-3.

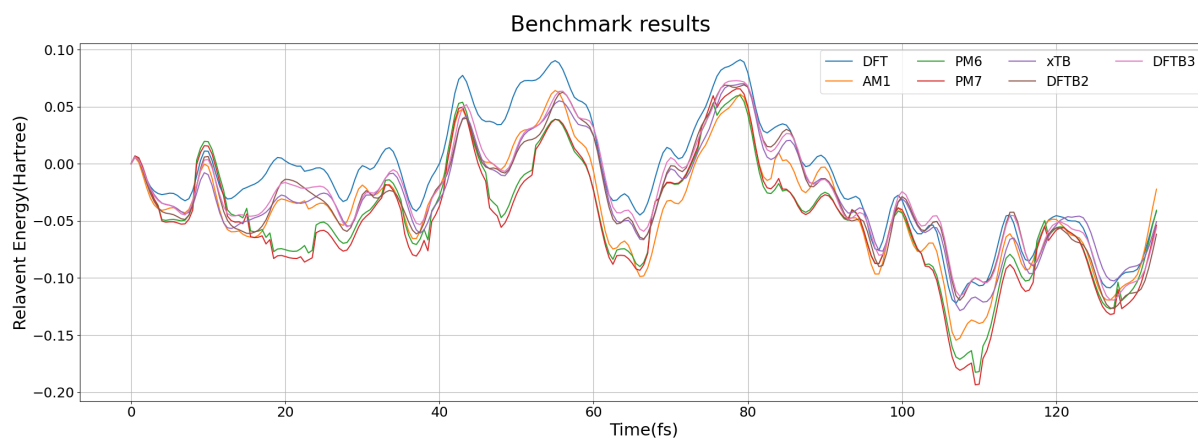

Figure S79: Carbon-19,Trajectory-4.

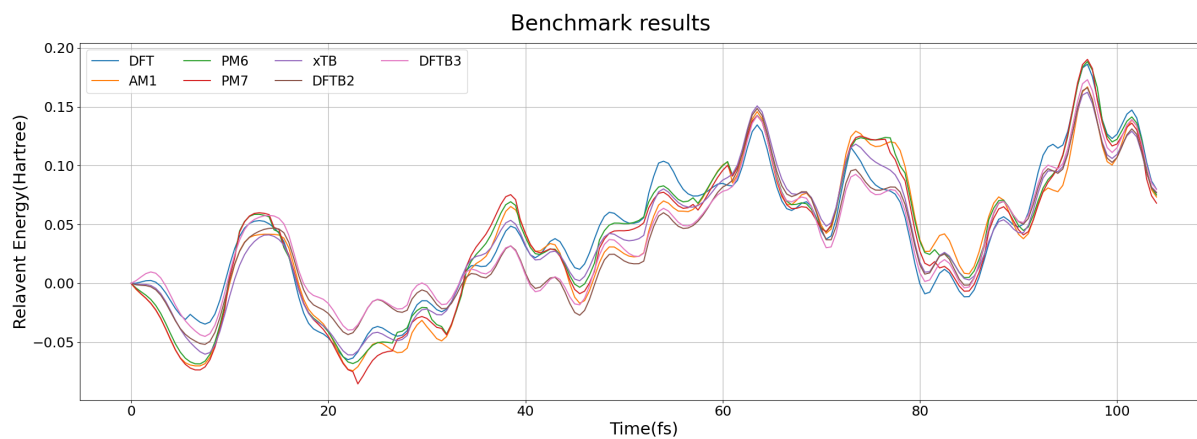

Figure S80: Carbon-19,Trajectory-5.

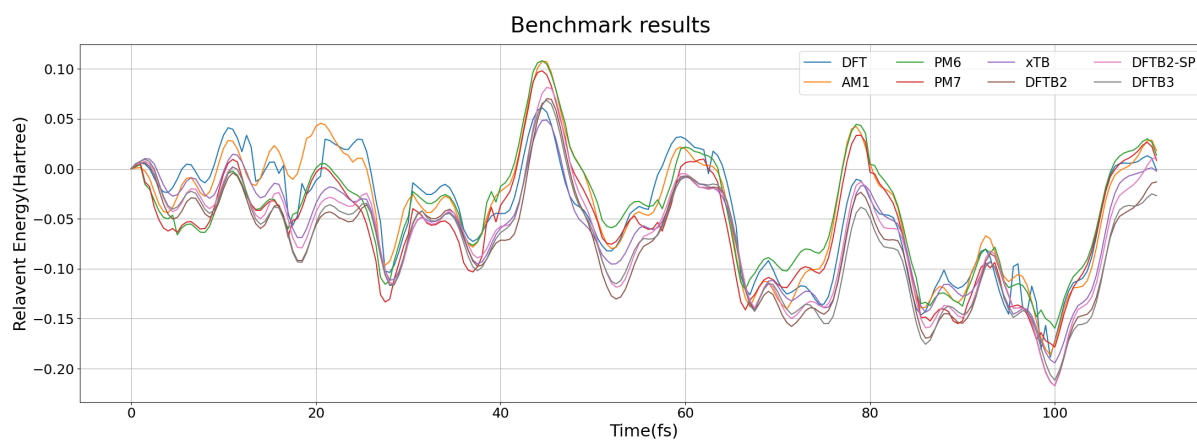

Figure S81: Carbon-20,Trajectory-1.

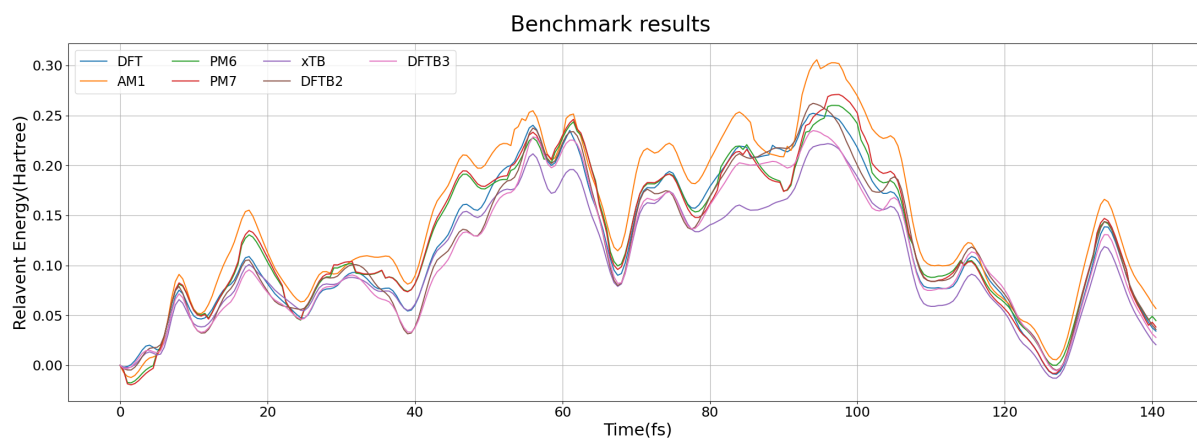

Figure S82: Carbon-20,Trajectory-2.

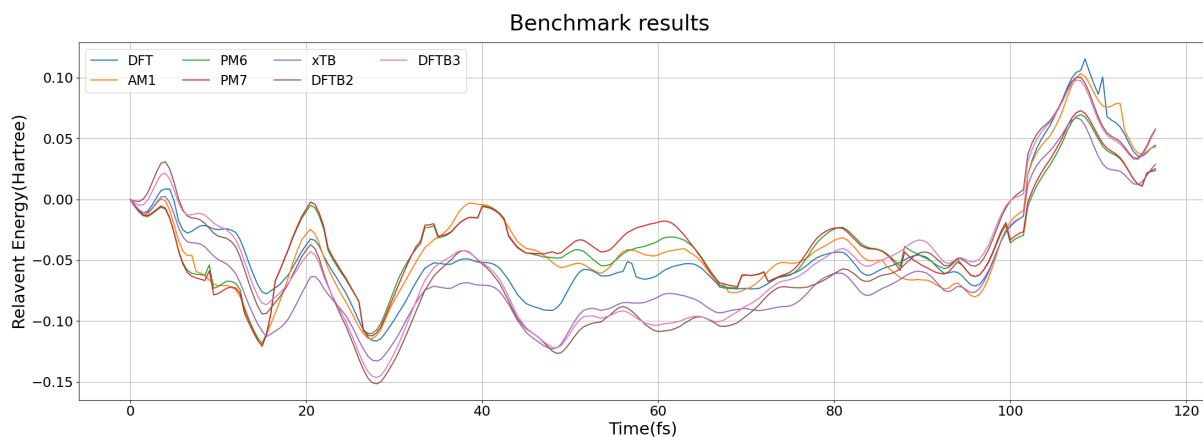

Figure S83: Carbon-23, Trajectory-1.

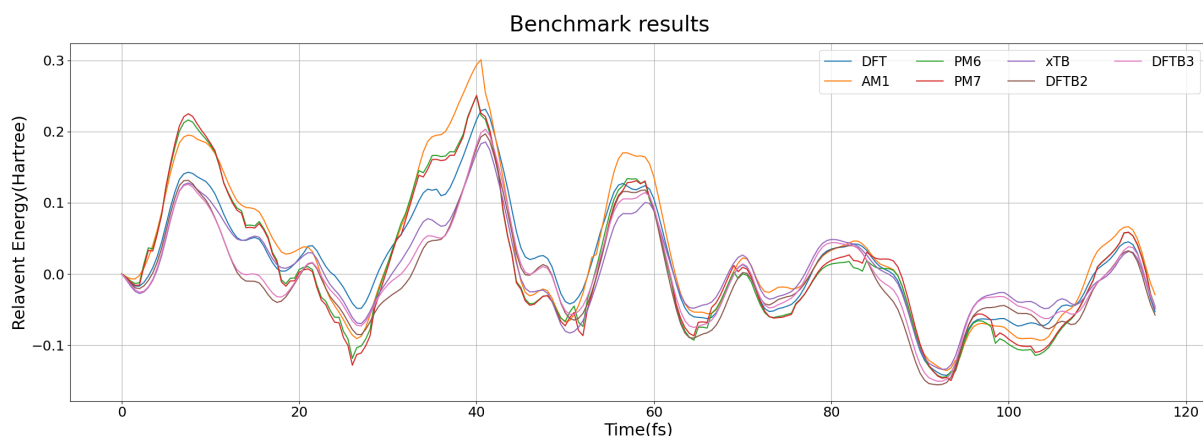

Figure S84: Carbon-24, Trajectory-1.

## 2 Trajectory energy profiles shape

In the article, Spearman's rank correlation coefficient  $\rho$  is used to quantitatively measure the similarity of energy profiles, this coefficient is calculated by Equation 1,

$$\rho = 1 - \frac{6 \sum d_i^2}{n(n^2 - 1)}. \quad (1)$$

For the 84 trajectories, the corresponding DFT energy profile is used as a reference, and the coefficient  $\rho$  of each SE method is calculated respectively. All the data are listed in Table. S1 and Table. S2, and the colorscale plot Fig. S85 and Fig. S86 containing the data is also provided, the rightmost side of each row is the average value of the trajectory energy profile  $\rho$  value of the soot molecule calculated by all methods. The end of Fig. S86 shows the average of all soot molecular coefficient  $\rho$  values calculated for each method, the colorscale plot is used to represent the the overall performance of the different SE methods. The data in the table is the value of  $\rho$ , the values are the same as that in Table. S1 and Table. S2.

|       | AM1    | PM6    | PM7    | xTB    | DFTB2-SP | DFTB2  | DFTB3  | AVERAGE |
|-------|--------|--------|--------|--------|----------|--------|--------|---------|
| C4-1  | 0.9496 | 0.9438 | 0.9411 | 0.9631 | 0.8909   | 0.8820 | 0.9165 | 0.9267  |
| C4-2  | 0.9418 | 0.9426 | 0.9474 | 0.9526 | -        | 0.8855 | 0.9156 | 0.9309  |
| C5-1  | 0.9717 | 0.9431 | 0.9415 | 0.9036 | 0.9435   | 0.9635 | 0.9774 | 0.9492  |
| C5-2  | 0.7939 | 0.8132 | 0.7912 | 0.9138 | -        | 0.8995 | 0.9642 | 0.8626  |
| C5-3  | 0.9454 | 0.9194 | 0.9028 | 0.8127 | -        | 0.9044 | 0.8752 | 0.8933  |
| C5-4  | 0.9443 | 0.9002 | 0.9071 | 0.9818 | -        | 0.9539 | 0.9469 | 0.9390  |
| C5-5  | 0.9474 | 0.8646 | 0.8674 | 0.9816 | -        | 0.9576 | 0.9715 | 0.9317  |
| C5-6  | 0.9661 | 0.9694 | 0.9729 | 0.9781 | -        | 0.9745 | 0.9688 | 0.9716  |
| C5-7  | 0.9701 | 0.8518 | 0.8570 | 0.9561 | -        | 0.9591 | 0.9503 | 0.9241  |
| C6-1  | 0.9243 | 0.9332 | 0.9472 | 0.9728 | 0.9545   | 0.9451 | 0.9564 | 0.9476  |
| C6-2  | 0.9639 | 0.9442 | 0.9330 | 0.9467 | 0.9139   | 0.9123 | 0.9421 | 0.9366  |
| C6-3  | 0.9631 | 0.9663 | 0.9676 | 0.9702 | -        | 0.9757 | 0.9639 | 0.9678  |
| C6-4  | 0.8951 | 0.9085 | 0.8965 | 0.9613 | 0.9151   | 0.9187 | 0.9475 | 0.9204  |
| C6-5  | 0.8476 | 0.8628 | 0.8141 | 0.9055 | -        | 0.8262 | 0.8811 | 0.8562  |
| C6-6  | 0.9629 | 0.9088 | 0.9063 | 0.9250 | -        | 0.9213 | 0.9446 | 0.9282  |
| C6-7  | 0.9785 | 0.9425 | 0.9331 | 0.9736 | -        | 0.9621 | 0.9760 | 0.9610  |
| C6-8  | 0.9394 | 0.8644 | 0.8271 | 0.9249 | -        | 0.9111 | 0.9534 | 0.9034  |
| C6-9  | 0.9642 | 0.9462 | 0.9330 | 0.9751 | -        | 0.9772 | 0.9754 | 0.9618  |
| C6-10 | 0.9339 | 0.8508 | 0.8390 | 0.9421 | 0.9051   | 0.8922 | 0.9510 | 0.9020  |
| C6-11 | 0.8901 | 0.8834 | 0.8837 | 0.9094 | 0.9032   | 0.8990 | 0.9008 | 0.8957  |
| C6-12 | 0.9532 | 0.8949 | 0.8658 | 0.9601 | -        | 0.9623 | 0.9614 | 0.9330  |
| C6-13 | 0.9615 | 0.9488 | 0.9542 | 0.9860 | -        | 0.9687 | 0.9638 | 0.9638  |
| C6-14 | 0.9277 | 0.9464 | 0.9316 | 0.9634 | -        | 0.9302 | 0.9827 | 0.9470  |
| C6-15 | 0.9499 | 0.9464 | 0.9238 | 0.6468 | -        | 0.8245 | 0.7939 | 0.8475  |
| C6-16 | 0.9201 | 0.9301 | 0.9101 | 0.9739 | -        | 0.8922 | 0.9379 | 0.9274  |
| C6-17 | 0.9245 | 0.9121 | 0.8997 | 0.9216 | -        | 0.8701 | 0.8902 | 0.9030  |
| C6-18 | 0.7667 | 0.7715 | 0.7570 | 0.7335 | -        | 0.8728 | 0.9162 | 0.8030  |
| C7-1  | 0.9515 | 0.9690 | 0.9675 | 0.9792 | 0.9861   | 0.9856 | 0.9763 | 0.9736  |
| C7-2  | 0.9504 | 0.9394 | 0.9342 | 0.8743 | -        | 0.9443 | 0.8581 | 0.9168  |
| C7-3  | 0.8801 | 0.8696 | 0.8572 | 0.9357 | 0.8767   | 0.8820 | 0.9533 | 0.8935  |
| C7-4  | 0.9819 | 0.9756 | 0.9734 | 0.9896 | -        | 0.9646 | 0.9535 | 0.9731  |
| C7-5  | 0.9253 | 0.8876 | 0.8892 | 0.9559 | -        | 0.9582 | 0.9676 | 0.9306  |
| C7-6  | 0.9687 | 0.9600 | 0.9603 | 0.9895 | -        | 0.9829 | 0.9862 | 0.9746  |
| C7-7  | 0.8921 | 0.9077 | 0.9071 | 0.9792 | -        | 0.9510 | 0.9517 | 0.9315  |
| C7-8  | 0.9193 | 0.8691 | 0.8699 | 0.9680 | 0.9361   | 0.9121 | 0.9449 | 0.9171  |
| C7-9  | 0.8513 | 0.8996 | 0.8944 | 0.9934 | 0.9264   | 0.9235 | 0.9548 | 0.9205  |
| C8-1  | 0.9472 | 0.9703 | 0.9599 | 0.9034 | -        | 0.9195 | 0.9131 | 0.9356  |
| C8-2  | 0.6844 | 0.7473 | 0.7074 | 0.9077 | 0.8746   | 0.8771 | 0.9326 | 0.8187  |
| C8-3  | 0.9098 | 0.9298 | 0.9358 | 0.9660 | 0.9228   | 0.9221 | 0.9263 | 0.9304  |
| C8-4  | 0.9591 | 0.9393 | 0.9257 | 0.9814 | -        | 0.9398 | 0.9474 | 0.9488  |
| C8-5  | 0.9497 | 0.9528 | 0.9529 | 0.9548 | -        | 0.8985 | 0.9348 | 0.9406  |
| C8-6  | 0.9292 | 0.9199 | 0.9165 | 0.9477 | 0.9583   | 0.9532 | 0.9460 | 0.9387  |
| C8-7  | 0.7233 | 0.8548 | 0.8142 | 0.9459 | 0.7244   | 0.7294 | 0.8697 | 0.8088  |

Figure S85: The rules of the colorscale plot in the figure are the same as in the article, the larger the  $\rho$ , the trajectory energy calculated by the corresponding SE method is closer to the calculation result of the DFT method, then it corresponds to darker green, and the smaller  $\rho$  is, the closer the color is to dark red. The rightmost column of the table is the average of the  $\rho$  values of all SE methods corresponding to each track, and this table is the Part-1.

|         | AM1    | PM6    | PM7    | xtB    | DFTB2-SP | DFTB2  | DFTB3  | AVERAGE |
|---------|--------|--------|--------|--------|----------|--------|--------|---------|
| C10-1   | 0.8830 | 0.8989 | 0.8548 | 0.9193 | -        | 0.8176 | 0.8904 | 0.8773  |
| C10-2   | 0.9233 | 0.9276 | 0.8996 | 0.9496 | -        | 0.9215 | 0.9584 | 0.9300  |
| C10-3   | 0.7492 | 0.8054 | 0.7767 | 0.8787 | -        | 0.8795 | 0.9257 | 0.8359  |
| C10-4   | 0.9134 | 0.8015 | 0.7940 | 0.9453 | -        | 0.9071 | 0.9136 | 0.8791  |
| C10-5   | 0.8710 | 0.8087 | 0.7925 | 0.8551 | -        | 0.8773 | 0.8938 | 0.8497  |
| C10-6   | 0.9513 | 0.8726 | 0.8694 | 0.9287 | -        | 0.8935 | 0.9152 | 0.9051  |
| C10-7-0 | 0.9703 | 0.9653 | 0.9708 | 0.9830 | -        | 0.8832 | 0.8792 | 0.9420  |
| C11-1   | 0.8234 | 0.8200 | 0.8190 | 0.7807 | -        | 0.8384 | 0.8448 | 0.8210  |
| C11-2   | 0.9513 | 0.8873 | 0.8753 | 0.9591 | -        | 0.9654 | 0.9792 | 0.9363  |
| C11-3   | 0.9563 | 0.9650 | 0.9644 | 0.9879 | 0.9568   | 0.9603 | 0.9685 | 0.9656  |
| C11-4   | 0.8850 | 0.8740 | 0.8655 | 0.9464 | -        | 0.8908 | 0.9276 | 0.8982  |
| C11-5   | 0.9753 | 0.9707 | 0.9269 | 0.9833 | -        | 0.9496 | 0.9593 | 0.9609  |
| C12-1   | 0.9411 | 0.9462 | 0.9398 | 0.9550 | -        | 0.8867 | 0.8876 | 0.9261  |
| C12-2-0 | 0.9713 | 0.9366 | 0.9450 | 0.9819 | -        | 0.9676 | 0.9647 | 0.9612  |
| C12-3   | 0.8341 | 0.8747 | 0.8198 | 0.9050 | -        | 0.7726 | 0.8503 | 0.8427  |
| C12-4   | 0.9796 | 0.9744 | 0.9722 | 0.9534 | -        | 0.9290 | 0.9468 | 0.9592  |
| C12-5   | 0.9034 | 0.9032 | 0.9025 | 0.9281 | -        | 0.9535 | 0.9534 | 0.9240  |
| C12-6   | 0.9520 | 0.8526 | 0.8336 | 0.9057 | -        | 0.8829 | 0.8631 | 0.8817  |
| C12-7   | 0.8969 | 0.8440 | 0.8639 | 0.9853 | 0.9354   | 0.9384 | 0.9794 | 0.9205  |
| C14-1   | 0.8944 | 0.9149 | 0.9176 | 0.9746 | -        | 0.9688 | 0.9794 | 0.9416  |
| C15-1   | 0.9448 | 0.9237 | 0.9142 | 0.9861 | -        | 0.9611 | 0.9827 | 0.9521  |
| C16-1   | 0.9480 | 0.9428 | 0.9426 | 0.9879 | 0.9779   | 0.9711 | 0.9821 | 0.9646  |
| C16-2   | 0.9430 | 0.9062 | 0.8798 | 0.9549 | -        | 0.9372 | 0.9507 | 0.9286  |
| C16-3   | 0.9625 | 0.9425 | 0.9360 | 0.9491 | -        | 0.9572 | 0.9386 | 0.9477  |
| C16-4   | 0.9341 | 0.9243 | 0.9256 | 0.9784 | -        | 0.9516 | 0.9538 | 0.9446  |
| C16-5   | 0.9574 | 0.9532 | 0.9532 | 0.9835 | 0.9646   | 0.9468 | 0.9620 | 0.9601  |
| C17-1   | 0.9342 | 0.9139 | 0.9100 | 0.9645 | -        | 0.9486 | 0.9636 | 0.9391  |
| C17-2   | 0.9655 | 0.9650 | 0.9612 | 0.9765 | -        | 0.9870 | 0.9923 | 0.9746  |
| C17-3   | 0.9502 | 0.9389 | 0.9241 | 0.9743 | -        | 0.9317 | 0.9311 | 0.9417  |
| C17-4-0 | 0.9784 | 0.9273 | 0.9375 | 0.9735 | -        | 0.9932 | 0.9954 | 0.9675  |
| C17-5   | 0.8631 | 0.8370 | 0.7900 | 0.9003 | -        | 0.9459 | 0.9622 | 0.8831  |
| C17-6   | 0.8467 | 0.9194 | 0.9206 | 0.9882 | 0.9252   | 0.9211 | 0.9651 | 0.9266  |
| C19-1   | 0.9352 | 0.9121 | 0.9108 | 0.9767 | -        | 0.8872 | 0.9327 | 0.9258  |
| C19-2   | 0.9294 | 0.9080 | 0.8591 | 0.9456 | -        | 0.9187 | 0.9272 | 0.9146  |
| C19-3   | 0.9179 | 0.8625 | 0.8700 | 0.9225 | -        | 0.8975 | 0.9439 | 0.9024  |
| C19-4   | 0.9563 | 0.8928 | 0.8771 | 0.9750 | -        | 0.9665 | 0.9808 | 0.9414  |
| C19-5   | 0.9376 | 0.9673 | 0.9634 | 0.9747 | -        | 0.9457 | 0.9536 | 0.9570  |
| C20-1   | 0.8991 | 0.8217 | 0.8538 | 0.9484 | 0.9385   | 0.9289 | 0.9408 | 0.9045  |
| C20-2   | 0.9793 | 0.9815 | 0.9774 | 0.9814 | -        | 0.9884 | 0.9890 | 0.9828  |
| C23-1   | 0.7008 | 0.6998 | 0.6620 | 0.9468 | -        | 0.8983 | 0.9017 | 0.8016  |
| C24-1   | 0.9548 | 0.9489 | 0.9371 | 0.9338 | -        | 0.9343 | 0.9485 | 0.9429  |
|         | AM1    | PM6    | PM7    | xtB    | DFTB2-SP | DFTB2  | DFTB3  |         |
| AVERAGE | 0.9220 | 0.9043 | 0.8948 | 0.9521 | 0.9497   | 0.9273 | 0.9391 | 0.9319  |

Figure S86: Colorscale plot of the 84 trajectories, the bottom of the table is the average value of  $\rho$  obtained by calculating 84 trajectories by the SE method corresponding to this column, this table is the Part-2.



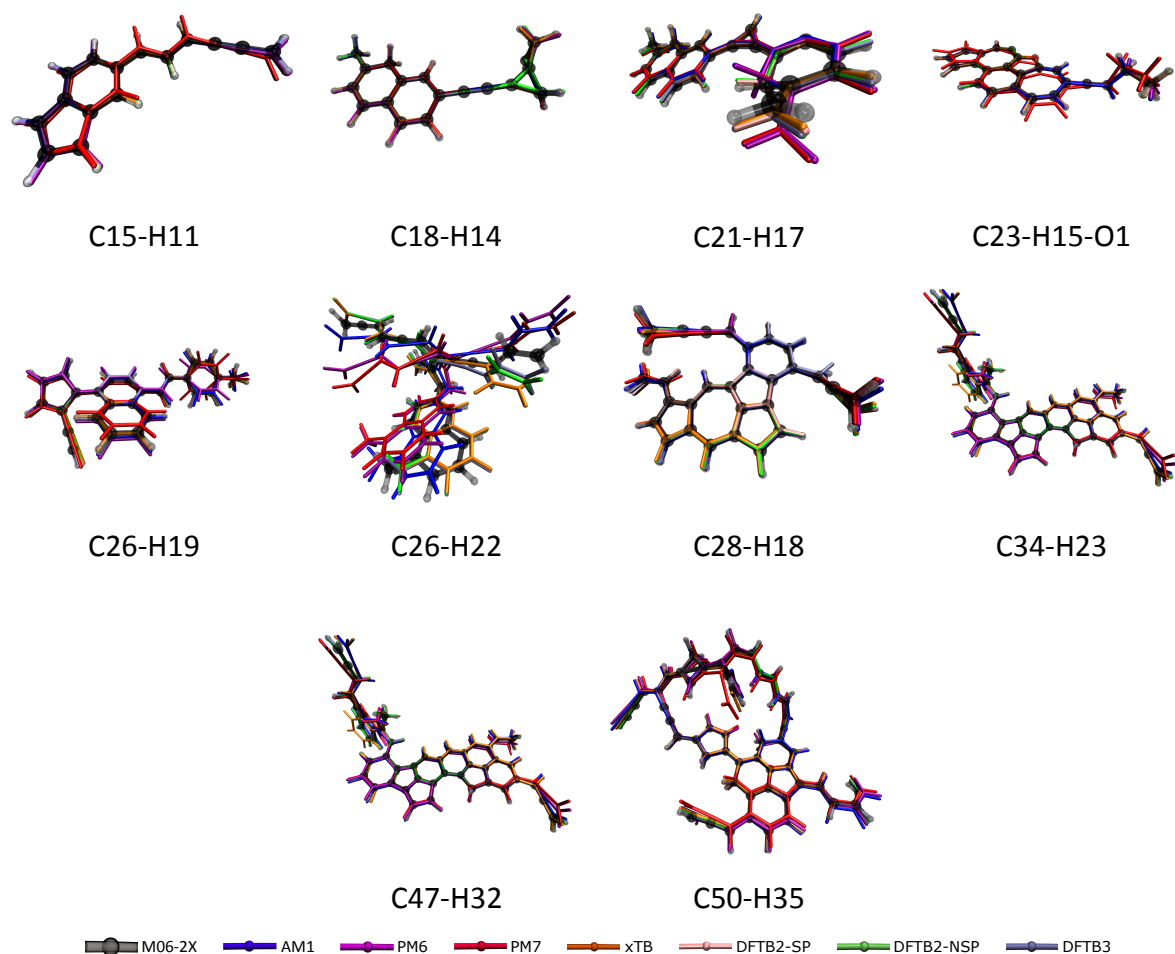

Figure S87: In order to verify the performance of the various methods in the previous section, 10 soot molecules in MD trajectory are selected as examples, The figure shows the structures of 10 soot molecules optimized by different SE methods, of which the semitransparent structure is the reference optimized by the DFT method, and the structures optimized by other SE methods are represented by lines with different colors.

### 3 The structures optimized by different methods

In order to verify the performance of the various methods in the previous section, 10 soot molecules in MD trajectory are selected as examples, in the article, we only show the structural comparison of C50-H35 molecule optimized by different methods as an example. In the Supporting Information part, the structural comparison of all molecules will be shown in Fig. S87. Table. S3 is the same as Table. 1 in the article, these can be used for structural comparisons of other 9 molecules.

In the article, in addition to the 10 soot molecules selected from the molecular dynamics trajectories, we also selected a group of 33 molecules from the RMG database to test the optimized structures of the SE methods in the text. All the data and structure are shown in Table. S4 and Table. S5.



Table S1: 84 MD trajectories from MD simulation were used to validate the accuracy of SE methods against M06-2x/def2TZVPP level QM calculation. The table lists the coefficient  $\rho$  values of the energy profiles calculated by different SE methods for each trajectory compared with the DFT calculation results.  $\rho$  is calculated according to Equation. 1 in the article, and this Table is the Part-1.

|       | AM1    | PM6    | PM7    | xTB    | DFTB2-SP | DFTB2  | DFTB3  |
|-------|--------|--------|--------|--------|----------|--------|--------|
| C4-1  | 0.9496 | 0.9438 | 0.9411 | 0.9631 | 0.8909   | 0.8820 | 0.9165 |
| C4-2  | 0.9418 | 0.9426 | 0.9474 | 0.9526 | -        | 0.8855 | 0.9156 |
| C5-1  | 0.9717 | 0.9431 | 0.9415 | 0.9036 | 0.9435   | 0.9635 | 0.9774 |
| C5-2  | 0.7939 | 0.8132 | 0.7912 | 0.9138 | -        | 0.8995 | 0.9642 |
| C5-3  | 0.9454 | 0.9194 | 0.9028 | 0.8127 | -        | 0.9044 | 0.8752 |
| C5-4  | 0.9443 | 0.9002 | 0.9071 | 0.9818 | -        | 0.9539 | 0.9469 |
| C5-5  | 0.9474 | 0.8646 | 0.8674 | 0.9816 | -        | 0.9576 | 0.9715 |
| C5-6  | 0.9661 | 0.9694 | 0.9729 | 0.9781 | -        | 0.9745 | 0.9688 |
| C5-7  | 0.9701 | 0.8518 | 0.8570 | 0.9561 | -        | 0.9591 | 0.9503 |
| C6-1  | 0.9243 | 0.9332 | 0.9472 | 0.9728 | 0.9545   | 0.9451 | 0.9564 |
| C6-2  | 0.9639 | 0.9442 | 0.9330 | 0.9467 | 0.9139   | 0.9123 | 0.9421 |
| C6-3  | 0.9631 | 0.9663 | 0.9676 | 0.9702 | -        | 0.9757 | 0.9639 |
| C6-4  | 0.8951 | 0.9085 | 0.8965 | 0.9613 | 0.9151   | 0.9187 | 0.9475 |
| C6-5  | 0.8476 | 0.8628 | 0.8141 | 0.9055 | -        | 0.8262 | 0.8811 |
| C6-6  | 0.9629 | 0.9088 | 0.9063 | 0.9250 | -        | 0.9213 | 0.9446 |
| C6-7  | 0.9785 | 0.9425 | 0.9331 | 0.9736 | -        | 0.9621 | 0.9760 |
| C6-8  | 0.9394 | 0.8644 | 0.8271 | 0.9249 | -        | 0.9111 | 0.9534 |
| C6-9  | 0.9642 | 0.9462 | 0.9330 | 0.9751 | -        | 0.9772 | 0.9754 |
| C6-10 | 0.9339 | 0.8508 | 0.8390 | 0.9421 | 0.9051   | 0.8922 | 0.9510 |
| C6-11 | 0.8901 | 0.8834 | 0.8837 | 0.9094 | 0.9032   | 0.8990 | 0.9008 |
| C6-12 | 0.9532 | 0.8949 | 0.8658 | 0.9601 | -        | 0.9623 | 0.9614 |
| C6-13 | 0.9615 | 0.9488 | 0.9542 | 0.9860 | -        | 0.9687 | 0.9638 |
| C6-14 | 0.9277 | 0.9464 | 0.9316 | 0.9634 | -        | 0.9302 | 0.9827 |
| C6-15 | 0.9499 | 0.9464 | 0.9238 | 0.6468 | -        | 0.8245 | 0.7939 |
| C6-16 | 0.9201 | 0.9301 | 0.9101 | 0.9739 | -        | 0.8922 | 0.9379 |
| C6-17 | 0.9245 | 0.9121 | 0.8997 | 0.9216 | -        | 0.8701 | 0.8902 |
| C6-18 | 0.7667 | 0.7715 | 0.7570 | 0.7335 | -        | 0.8728 | 0.9162 |
| C7-1  | 0.9515 | 0.9690 | 0.9675 | 0.9792 | 0.9861   | 0.9856 | 0.9763 |
| C7-2  | 0.9504 | 0.9394 | 0.9342 | 0.8743 | -        | 0.9443 | 0.8581 |
| C7-3  | 0.8801 | 0.8696 | 0.8572 | 0.9357 | 0.8767   | 0.8820 | 0.9533 |
| C7-4  | 0.9819 | 0.9756 | 0.9734 | 0.9896 | -        | 0.9646 | 0.9535 |
| C7-5  | 0.9253 | 0.8876 | 0.8892 | 0.9559 | -        | 0.9582 | 0.9676 |
| C7-6  | 0.9687 | 0.9600 | 0.9603 | 0.9895 | -        | 0.9829 | 0.9862 |
| C7-7  | 0.8921 | 0.9077 | 0.9071 | 0.9792 | -        | 0.9510 | 0.9517 |
| C7-8  | 0.9193 | 0.8691 | 0.8699 | 0.9680 | 0.9361   | 0.9121 | 0.9449 |
| C7-9  | 0.8513 | 0.8996 | 0.8944 | 0.9934 | 0.9264   | 0.9235 | 0.9548 |
| C8-1  | 0.9472 | 0.9703 | 0.9599 | 0.9034 | -        | 0.9195 | 0.9131 |
| C8-2  | 0.6844 | 0.7473 | 0.7074 | 0.9077 | 0.8746   | 0.8771 | 0.9326 |
| C8-3  | 0.9098 | 0.9298 | 0.9358 | 0.9660 | 0.9228   | 0.9221 | 0.9263 |
| C8-4  | 0.9591 | 0.9393 | 0.9257 | 0.9814 | -        | 0.9398 | 0.9474 |
| C8-5  | 0.9497 | 0.9528 | 0.9529 | 0.9548 | -        | 0.8985 | 0.9348 |
| C8-6  | 0.9292 | 0.9199 | 0.9165 | 0.9477 | 0.9583   | 0.9532 | 0.9460 |
| C8-7  | 0.7233 | 0.8548 | 0.8142 | 0.9459 | 0.7244   | 0.7294 | 0.8697 |

Table S2: The table lists the coefficient  $\rho$  values of the energy profiles calculated by different SE methods for each trajectory compared with the DFT calculation results, this is the Part-2.

|         | AM1    | PM6    | PM7    | xTB    | DFTB2-SP | DFTB2  | DFTB3  |
|---------|--------|--------|--------|--------|----------|--------|--------|
| C10-1   | 0.8830 | 0.8989 | 0.8548 | 0.9193 | -        | 0.8176 | 0.8904 |
| C10-2   | 0.9233 | 0.9276 | 0.8996 | 0.9496 | -        | 0.9215 | 0.9584 |
| C10-3   | 0.7492 | 0.8054 | 0.7767 | 0.8787 | -        | 0.8795 | 0.9257 |
| C10-4   | 0.9134 | 0.8015 | 0.7940 | 0.9453 | -        | 0.9071 | 0.9136 |
| C10-5   | 0.8710 | 0.8087 | 0.7925 | 0.8551 | -        | 0.8773 | 0.8938 |
| C10-6   | 0.9513 | 0.8726 | 0.8694 | 0.9287 | -        | 0.8935 | 0.9152 |
| C10-7-O | 0.9703 | 0.9653 | 0.9708 | 0.9830 | -        | 0.8832 | 0.8792 |
| C11-1   | 0.8234 | 0.8200 | 0.8190 | 0.7807 | -        | 0.8384 | 0.8448 |
| C11-2   | 0.9513 | 0.8873 | 0.8753 | 0.9591 | -        | 0.9654 | 0.9792 |
| C11-3   | 0.9563 | 0.9650 | 0.9644 | 0.9879 | 0.9568   | 0.9603 | 0.9685 |
| C11-4   | 0.8850 | 0.8740 | 0.8655 | 0.9464 | -        | 0.8908 | 0.9276 |
| C11-5   | 0.9753 | 0.9707 | 0.9269 | 0.9833 | -        | 0.9496 | 0.9593 |
| C12-1   | 0.9411 | 0.9462 | 0.9398 | 0.9550 | -        | 0.8867 | 0.8876 |
| C12-2-O | 0.9713 | 0.9366 | 0.9450 | 0.9819 | -        | 0.9676 | 0.9647 |
| C12-3   | 0.8341 | 0.8747 | 0.8198 | 0.9050 | -        | 0.7726 | 0.8503 |
| C12-4   | 0.9796 | 0.9744 | 0.9722 | 0.9534 | -        | 0.9290 | 0.9468 |
| C12-5   | 0.9034 | 0.9032 | 0.9025 | 0.9281 | -        | 0.9535 | 0.9534 |
| C12-6   | 0.9520 | 0.8526 | 0.8336 | 0.9057 | -        | 0.8829 | 0.8631 |
| C12-7   | 0.8969 | 0.8440 | 0.8639 | 0.9853 | 0.9354   | 0.9384 | 0.9794 |
| C14-1   | 0.8944 | 0.9149 | 0.9176 | 0.9746 | -        | 0.9688 | 0.9794 |
| C15-1   | 0.9448 | 0.9237 | 0.9142 | 0.9861 | -        | 0.9611 | 0.9827 |
| C16-1   | 0.9480 | 0.9428 | 0.9426 | 0.9879 | 0.9779   | 0.9711 | 0.9821 |
| C16-2   | 0.9430 | 0.9062 | 0.8798 | 0.9549 | -        | 0.9372 | 0.9507 |
| C16-3   | 0.9625 | 0.9425 | 0.9360 | 0.9491 | -        | 0.9572 | 0.9386 |
| C16-4   | 0.9341 | 0.9243 | 0.9256 | 0.9784 | -        | 0.9516 | 0.9538 |
| C16-5   | 0.9574 | 0.9532 | 0.9532 | 0.9835 | 0.9646   | 0.9468 | 0.9620 |
| C17-1   | 0.9342 | 0.9139 | 0.9100 | 0.9645 | -        | 0.9486 | 0.9636 |
| C17-2   | 0.9655 | 0.9650 | 0.9612 | 0.9765 | -        | 0.9870 | 0.9923 |
| C17-3   | 0.9502 | 0.9389 | 0.9241 | 0.9743 | -        | 0.9317 | 0.9311 |
| C17-4-O | 0.9784 | 0.9273 | 0.9375 | 0.9735 | -        | 0.9932 | 0.9954 |
| C17-5   | 0.8631 | 0.8370 | 0.7900 | 0.9003 | -        | 0.9459 | 0.9622 |
| C17-6   | 0.8467 | 0.9194 | 0.9206 | 0.9882 | 0.9252   | 0.9211 | 0.9651 |
| C19-1   | 0.9352 | 0.9121 | 0.9108 | 0.9767 | -        | 0.8872 | 0.9327 |
| C19-2   | 0.9294 | 0.9080 | 0.8591 | 0.9456 | -        | 0.9187 | 0.9272 |
| C19-3   | 0.9179 | 0.8625 | 0.8700 | 0.9225 | -        | 0.8975 | 0.9439 |
| C19-4   | 0.9563 | 0.8928 | 0.8771 | 0.9750 | -        | 0.9665 | 0.9808 |
| C19-5   | 0.9376 | 0.9673 | 0.9634 | 0.9747 | -        | 0.9457 | 0.9536 |
| C20-1   | 0.8991 | 0.8217 | 0.8538 | 0.9484 | 0.9385   | 0.9289 | 0.9408 |
| C20-2   | 0.9793 | 0.9815 | 0.9774 | 0.9814 | -        | 0.9884 | 0.9890 |
| C23-1   | 0.7008 | 0.6998 | 0.6620 | 0.9468 | -        | 0.8983 | 0.9017 |
| C24-1   | 0.9548 | 0.9489 | 0.9371 | 0.9338 | -        | 0.9343 | 0.9485 |

Table S3: In Fig. S87, 10 soot molecules in MD trajectory are selected as examples, The RMSE of the structures optimized by each SE method and the DFT reference structure were calculated, the results were shown in this table.

|            | AM1    | PM6    | PM7    | xTB    | DFTB2-SP | DFTB2  | DFTB3  |
|------------|--------|--------|--------|--------|----------|--------|--------|
| C15-H11    | 0.0456 | 0.0915 | 0.3517 | 0.0563 | 0.0602   | 0.0602 | 0.0536 |
| C18-H14    | 0.0824 | 0.1040 | 0.0943 | 0.0674 | -        | 0.0887 | 0.0761 |
| C21-H17    | 0.5073 | 0.5068 | 0.5143 | 0.1463 | 0.1689   | 0.2087 | 0.2087 |
| C23-H15-O1 | 0.1819 | 0.1710 | 0.5080 | 0.0497 | 0.0642   | 0.0609 | 0.0656 |
| C26-H19    | 0.3568 | 0.6439 | 0.6862 | 0.1690 | 0.1931   | 0.1929 | 0.2592 |
| C26-H22    | 1.2711 | 2.4898 | 2.5142 | 0.9765 | -        | 0.7924 | 0.7377 |
| C28-H18    | 0.2743 | 0.2878 | 0.2850 | 0.3956 | 0.3964   | 0.3883 | 0.3957 |
| C34-H23    | 0.7308 | 0.8423 | 0.8707 | 0.2865 | 0.2803   | 0.2870 | 0.2595 |
| C47-H32    | 0.3241 | 0.5465 | 0.6677 | 0.4234 | -        | 0.0998 | 0.1037 |
| C50-H35    | 0.3511 | 0.4144 | 0.5725 | 0.2471 | 0.1177   | 0.1183 | 0.0671 |

Table S4: A group of 33 molecules selected from the RMG database were optimized by the DFT method and various SE methods in the Table, respectively, then taking the DFT method as a reference, the RMSEs of the structures optimized by various SE methods and the reference structures were calculated, this Table is the Part-1.

|         | Structure                                                                           | AM1    | PM6    | PM7    | xTB    | DFTB2-SP | DFTB2  | DFTB3  |
|---------|-------------------------------------------------------------------------------------|--------|--------|--------|--------|----------|--------|--------|
| Soot 1  | 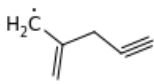   | 0.0241 | 0.0249 | 0.0324 | 0.0212 | 0.0216   | 0.0237 | 0.0126 |
| Soot 2  |    | 0.0252 | 0.0285 | 0.0271 | 0.0131 | 0.0213   | 0.0141 | 0.0166 |
| Soot 3  |    | 0.6965 | 0.3105 | 0.4668 | 0.0304 | 0.0149   | 0.0141 | 0.0104 |
| Soot 4  |    | 0.0827 | 0.0813 | 0.0814 | 0.0584 | 0.0562   | 0.0602 | 0.0517 |
| Soot 5  |    | 0.0827 | 0.0813 | 0.0813 | 0.0584 | 0.0639   | 0.0547 | 0.0527 |
| Soot 6  |   | 0.4062 | 0.4082 | 0.4096 | 0.1022 | 0.2345   | 0.2264 | 0.1892 |
| Soot 7  |  | 0.0746 | 0.0731 | 0.0723 | 0.0506 | 0.0506   | 0.0251 | 0.0350 |
| Soot 8  |  | 0.4908 | 0.1916 | 0.2807 | 0.0935 | 0.0142   | 0.0120 | 0.0139 |
| Soot 9  |  | 0.4381 | 0.5875 | 0.5288 | 0.0579 | 0.0479   | 0.0184 | 0.0269 |
| Soot 10 |  | 0.0341 | 0.0264 | 0.0262 | 0.0145 | 0.0155   | 0.0141 | 0.0130 |
| Soot 11 |  | 0.0315 | 0.0257 | 0.0251 | 0.0161 | 0.0349   | 0.0134 | 0.0107 |
| Soot 12 |  | 0.6517 | 0.6197 | 0.5414 | 0.1468 | 0.0493   | 0.0327 | 0.0237 |
| Soot 13 |  | 0.0637 | 0.0500 | 0.0507 | 0.0271 | 0.0320   | 0.0299 | 0.0308 |
| Soot 14 |  | 0.0430 | 0.0308 | 0.0307 | 0.0199 | 0.0357   | 0.0164 | 0.0138 |
| Soot 15 |  | 0.1948 | 0.3434 | 0.4015 | 0.0292 | 0.1237   | 0.1001 | 0.0576 |
| Soot 16 |  | 0.2674 | 0.2678 | 0.2672 | 0.2046 | 0.1626   | 0.1502 | 0.1549 |

Table S5: RMSE of 33 Optimized geometry of soots, Part-2

|         | Structure                                                                           | AM1    | PM6    | PM7    | xTB    | DFTB2-SP | DFTB2  | DFTB3  |
|---------|-------------------------------------------------------------------------------------|--------|--------|--------|--------|----------|--------|--------|
| Soot 17 |    | 0.0253 | 0.0277 | 0.0265 | 0.0130 | 0.0295   | 0.0175 | 0.0126 |
| Soot 18 |    | 0.3045 | 1.2356 | 1.2093 | 0.1694 | 0.0784   | 0.1245 | 0.0463 |
| Soot 19 |    | 0.0315 | 0.0271 | 0.0257 | 0.0121 | 0.0217   | 0.0238 | 0.0415 |
| Soot 20 |    | 0.0273 | 0.0281 | 0.0260 | 0.0139 | 0.0359   | 0.0162 | 0.0183 |
| Soot 21 |    | 0.5905 | 0.3708 | 0.3567 | 0.0812 | 0.0323   | 0.0221 | 0.0129 |
| Soot 22 |    | 0.3145 | 0.3656 | 0.3603 | 0.0575 | 0.0278   | 0.0195 | 0.0147 |
| Soot 23 |   | 0.2907 | 0.2522 | 0.3126 | 0.0361 | 0.0438   | 0.0336 | 0.0441 |
| Soot 24 |  | 0.4667 | 0.3288 | 0.2439 | 0.0248 | 0.1274   | 0.1195 | 0.1332 |
| Soot 25 |  | 0.1812 | 0.3018 | 0.2288 | 0.0523 | 0.0517   | 0.0343 | 0.0337 |
| Soot 26 |  | 0.1506 | 0.1231 | 0.1249 | 0.0964 | 0.1885   | 0.1066 | 0.1861 |
| Soot 27 |  | 0.3013 | 0.4114 | 0.3680 | 0.0624 | 0.0600   | 0.0289 | 0.0402 |
| Soot 28 |  | 0.0316 | 0.0313 | 0.0299 | 0.0180 | 0.0216   | 0.0145 | 0.0180 |
| Soot 29 |  | 0.2191 | 0.1891 | 0.2125 | 0.1352 | 0.0515   | 0.0361 | 0.0416 |
| Soot 30 |  | 0.0377 | 0.0339 | 0.0326 | 0.0162 | 0.0249   | 0.0169 | 0.0215 |
| Soot 31 |  | 0.3323 | 0.6863 | 0.5242 | 0.0424 | 0.0337   | 0.0228 | 0.0272 |
| Soot 32 |  | 0.0549 | 0.0553 | 0.0550 | 0.0169 | 0.0258   | 0.0168 | 0.0211 |
| Soot 33 |  | 0.0258 | 0.0227 | 0.0205 | 0.0116 | 0.0175   | 0.0151 | 0.0101 |
